# Supplementary material for: Nickel-catalyzed sulfonylative coupling of 2-chlorobenzothiazoles with sulfinates at room temperature
Source: Royal Society of Chemistry journal article supplement (doi:10.1039/d2cc06107d), 2022-12-19
Supplement: d2cc06107d1.pdf [file d2cc06107d1.pdf]

*Electronic Supplementary Material (ESI)*

*This journal is © The Royal Society of Chemistry 2022*

## **Supplementary data**

### **Nickel-catalyzed sulfonylative coupling of 2-chlorobenzothiazoles with sulfinates at room temperature**

Haibo Zhu<sup>a\*</sup>, Yingying Zhang<sup>a</sup>, Gaowen Ren<sup>a</sup>, Yaoqi Wang<sup>a</sup>, Jia Meng<sup>a</sup>, Qiangwen Fan<sup>a\*</sup>, Zongbo Xie<sup>a\*</sup>, Zhang-Gao Le<sup>a</sup>

<sup>a</sup> Jiangxi Province Key Laboratory of Synthetic Chemistry, East China University of Technology, Nanchang, 330013, China

E-mail: [hbzhu@ecut.edu.cn](mailto:hbzhu@ecut.edu.cn), [fanqw2019@ecut.edu.cn](mailto:fanqw2019@ecut.edu.cn), [zbxie@ecut.edu.cn](mailto:zbxie@ecut.edu.cn)

|                                                                                                 |    |
|-------------------------------------------------------------------------------------------------|----|
| 1. General .....                                                                                | 2  |
| 2. Experimental sections.....                                                                   | 2  |
| 2.1 Optimization of reaction conditions. ....                                                   | 2  |
| 3. Data for the benzyl sulfone products.....                                                    | 3  |
| 4. <sup>1</sup> H NMR, <sup>13</sup> CNMR and <sup>19</sup> F NMR for the sulfone products..... | 13 |
| 5. References. ....                                                                             | 40 |

## 1. General

All commercial reagents were used directly without further purification, unless otherwise stated. Dimethyl sulfoxide (DMSO) was purchased from J & K chemical, stored over 4 Å molecular sieves and handled under N<sub>2</sub>. DMSO-*d*<sub>6</sub> and CDCl<sub>3</sub> were purchased from Shanghai aladdin Biochemical Technology Co., Ltd. All Schlenk tubes and sealed vessels (50 mL) were purchased from Beijing Synthware Glass. The following abbreviations were used to describe NMR signals: s = singlet, d = doublet, t = triplet, m = multiplet, dd = doublet of doublets, q = quartet.

## 2. Experimental sections

### 2.1 Optimization of reaction conditions.

**Table S1.** Nickel Catalyst and additive Screening.<sup>a</sup>

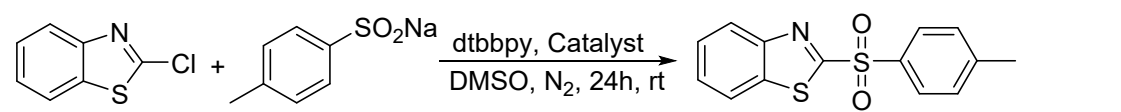

| Entry | Catalyst (mol%)                | Ligand (mol%)       | Yield (%) <sup>b</sup> |
|-------|--------------------------------|---------------------|------------------------|
| 1     | Ni(OTf) <sub>2</sub> (10 mol%) | <b>L1</b> (10 mol%) | 94                     |
| 2     | Cu(OAc) <sub>2</sub> (10 mol%) | <b>L1</b> (10 mol%) | 64                     |
| 3     | CuBr (10 mol%)                 | <b>L1</b> (10 mol%) | 76                     |
| 4     | CuCl <sub>2</sub> (10 mol%)    | <b>L1</b> (10 mol%) | 82                     |
| 5     | Cu(OTf) <sub>2</sub> (10 mol%) | <b>L1</b> (10 mol%) | 60                     |
| 6     | Fe(OTf) <sub>3</sub> (10 mol%) | <b>L1</b> (10 mol%) | 75                     |
| 7     | FeCl <sub>2</sub> (10 mol%)    | <b>L1</b> (10 mol%) | 83                     |
| 8     | FeCl <sub>3</sub> (10 mol%)    | <b>L1</b> (10 mol%) | 58                     |
| 9     | Ni(OTf) <sub>2</sub> (8 mol%)  | <b>L1</b> (10 mol%) | 80                     |
| 10    | Ni(OTf) <sub>2</sub> (5 mol%)  | <b>L1</b> (10 mol%) | 78                     |
| 11    | Ni(OTf) <sub>2</sub> (2 mol%)  | <b>L1</b> (10 mol%) | 72                     |
| 12    | Ni(OTf) <sub>2</sub> (10 mol%) | <b>L1</b> (5 mol%)  | 48                     |
| 13    | Ni(OTf) <sub>2</sub> (10 mol%) | <b>L1</b> (2 mol%)  | 20                     |

<sup>a</sup> Reaction conditions: **1a** (0.1 mmol, 1.0 equiv.), **2a** (0.2 mmol, 2.0 equiv.) in 1 mL DMSO under an atmosphere of N<sub>2</sub> for 24 h. <sup>b</sup> Isolated yield.

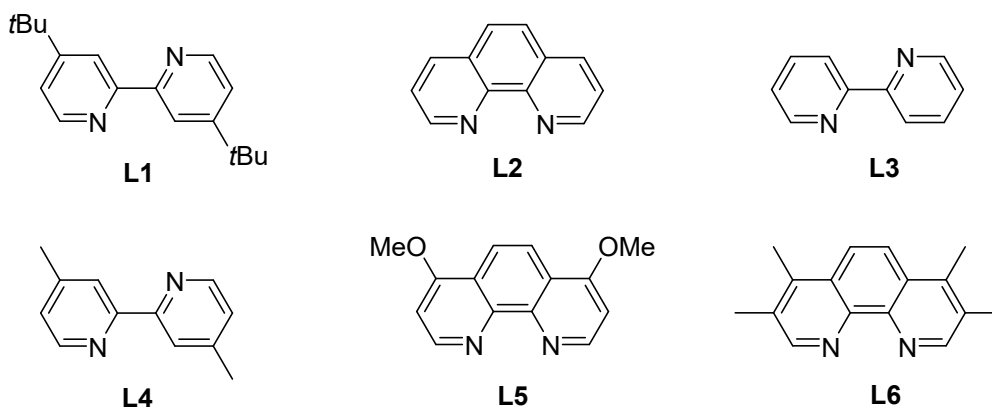

**Table S2.** Variation of time and molar ratio in optimization of reaction conditions.<sup>a</sup>

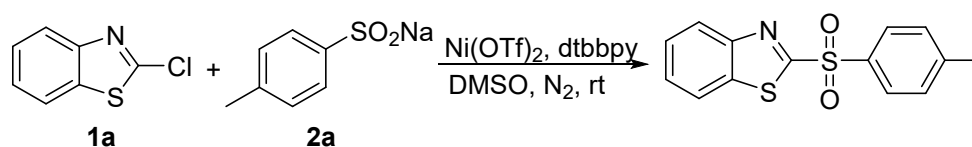

| Entry | 1a (equiv.) | 2a (equiv.) | Time/h | Yield (%) <sup>b</sup> |
|-------|-------------|-------------|--------|------------------------|
| 1     | 1.0         | 2.0         | 24     | 94                     |
| 2     | 1.0         | 3.0         | 24     | 81                     |
| 3     | 1.0         | 4.0         | 24     | 90                     |
| 4     | 1.0         | 1.0         | 24     | 83                     |
| 5     | 2.0         | 1.0         | 24     | 70                     |
| 6     | 3.0         | 1.0         | 24     | 60                     |
| 7     | 1.0         | 2.0         | 18     | 72                     |
| 8     | 1.0         | 2.0         | 12     | 70                     |
| 9     | 1.0         | 2.0         | 6      | 65                     |

<sup>a</sup> Reaction conditions: **1a** (0.1 mmol, 1.0 equiv.), **2a** (0.2 mmol, 2.0 equiv.) Ni(OTf)<sub>2</sub> (10 mol%), dtbbpy (10 mol%), in 1 mL DMSO under an atmosphere of N<sub>2</sub> for 24 h.

<sup>b</sup> Isolated yield.

### 3. Data for the benzyl sulfone products.

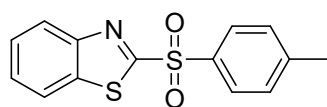

2-tosylbenzo[d]thiazole

**3a**<sup>1</sup>: Flash column chromatography (petroleum/ethyl acetate 4:1) afforded the titled sulfone as a light yellow solid; mp 130.2 -132.6 °C; <sup>1</sup>H NMR (500 MHz, CDCl<sub>3</sub>) δ 8.15 (d, *J* = 8.0 Hz, 1H), 8.04 (d, *J* = 8.0 Hz, 2H), 7.95 (d, *J* = 7.5 Hz, 1H), 7.58 - 7.51 (m, 2H), 7.38 (d, *J* = 8.5 Hz, 2H), 2.43 (s, 3H); <sup>13</sup>C NMR (126 MHz, CDCl<sub>3</sub>) δ 167.65, 152.90, 145.98, 137.02, 135.42, 130.25, 129.03, 127.84, 127.49, 125.52, 122.23, 21.81.

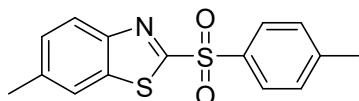

#### 6-methyl-2-tosylbenzo[d]thiazole

**3b**: Flash column chromatography (petroleum/ethyl acetate 4:1) afforded the titled sulfone as a light yellow solid; mp 138.6-139.1 °C; <sup>1</sup>H NMR (500 MHz, CDCl<sub>3</sub>) δ 8.02 (t, *J* = 8.5 Hz, 3H), 7.73 (s, 1H), 7.37 (d, *J* = 8.5 Hz, 3H), 2.51 (s, 3H), 2.43 (s, 3H); <sup>13</sup>C NMR (126 MHz, CDCl<sub>3</sub>) δ 166.33, 151.09, 145.82, 138.55, 137.32, 135.60, 130.21, 129.32, 128.95, 124.97, 121.66, 21.84, 21.80; HRMS (ESI) *m/z*: calcd for C<sub>15</sub>H<sub>13</sub>NO<sub>2</sub>S<sub>2</sub> [M + H]<sup>+</sup> 304.0460, found 304.0442.

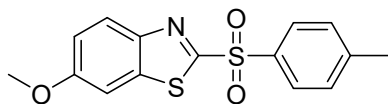

#### 6-methoxy-2-tosylbenzo[d]thiazole

**3c**: Flash column chromatography (petroleum/ethyl acetate 4:1) afforded the titled sulfone as a light yellow solid; mp 145.7-149.1 °C; <sup>1</sup>H NMR (500 MHz, CDCl<sub>3</sub>) δ 8.02 (dd, *J* = 9.0, 6.5 Hz, 3H), 7.37 (d, *J* = 8.0 Hz, 2H), 7.33 (d, *J* = 2.5 Hz, 1H), 7.15 (dd, *J* = 9.0, 2.5 Hz, 1H), 3.89 (s, 3H), 2.43 (s, 3H); <sup>13</sup>C NMR (126 MHz, CDCl<sub>3</sub>) δ 164.28, 159.57, 147.43, 145.69, 138.96, 135.73, 130.16, 128.82, 126.14, 117.98, 103.32, 55.90, 21.76; HRMS (ESI) *m/z*: calcd for C<sub>15</sub>H<sub>13</sub>NO<sub>3</sub>S<sub>2</sub> [M + H]<sup>+</sup> 320.0410, found 320.0393.

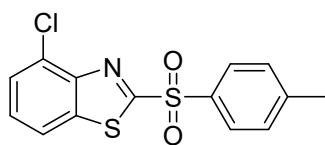

#### 4-chloro-2-tosylbenzo[d]thiazole

**3d:** Flash column chromatography (petroleum/ethyl acetate 4:1) afforded the titled sulfone as a light yellow solid; mp 124.9-125.5 °C; <sup>1</sup>H NMR (500 MHz, CDCl<sub>3</sub>) δ 8.06 (d, *J* = 8.0 Hz, 2H), 7.84 (d, *J* = 8.0 Hz, 1H), 7.57 (d, *J* = 8.0 Hz, 1H), 7.45 (t, *J* = 8.0 Hz, 1H), 7.38 (d, *J* = 8.0 Hz, 2H), 2.44 (s, 3H); <sup>13</sup>C NMR (126 MHz, CDCl<sub>3</sub>) δ 168.41, 150.23, 146.21, 138.29, 135.05, 130.41, 130.28, 129.19, 128.36, 127.73, 120.76, 21.85; HRMS (ESI) *m/z*: calcd for C<sub>14</sub>H<sub>10</sub>ClNO<sub>2</sub>S<sub>2</sub> [M + H]<sup>+</sup> 323.9914, found 323.9916.

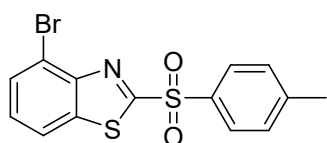

#### 4-bromo-2-tosylbenzo[d]thiazole

**3e:** Flash column chromatography (petroleum/ethyl acetate 4:1) afforded the titled sulfone as a light yellow solid; mp 143.5-143.7 °C; <sup>1</sup>H NMR (500 MHz, CDCl<sub>3</sub>) δ 8.06 (d, *J* = 8.5 Hz, 2H), 7.88 (d, *J* = 8.5 Hz, 1H), 7.74 (d, *J* = 7.5 Hz, 1H), 7.37 (dd, *J* = 14.5, 8.0 Hz, 3H), 2.43 (s, 3H); <sup>13</sup>C NMR (126 MHz, CDCl<sub>3</sub>) δ 168.16, 151.41, 146.18, 137.68, 135.08, 131.00, 130.25, 129.19, 128.58, 121.40, 119.04, 21.84; HRMS (ESI) *m/z*: calcd for C<sub>14</sub>H<sub>10</sub>BrNO<sub>2</sub>S<sub>2</sub> [M + H]<sup>+</sup> 367.9409, found 367.9395.

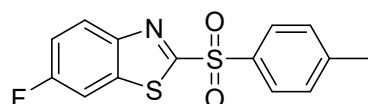

#### 6-fluoro-2-tosylbenzo[d]thiazole

**3f:** Flash column chromatography (petroleum/ethyl acetate 4:1) afforded the titled sulfone as a light yellow solid; mp 166.7-167.0 °C; <sup>1</sup>H NMR (500 MHz, CDCl<sub>3</sub>) δ 8.11 (dd, *J* = 9.5, 5.0 Hz, 1H), 8.03 (d, *J* = 8.5 Hz, 2H), 7.63 (dd, *J* = 8.0, 3.0 Hz, 1H), 7.39 (d, *J* = 8.0 Hz, 2H), 7.31 (td, *J* = 9.0, 2.5 Hz, 1H), 2.44 (s, 3H); <sup>13</sup>C NMR (126 MHz, CDCl<sub>3</sub>) δ 167.38 (d, *J* = 251.4 Hz), 161.75 (s) (d, *J* = 3.5 Hz), 149.56 (s), 146.14 (s), 138.22 (d, *J* = 11.2 Hz), 135.22 (s), 130.31 (s), 129.03 (s), 126.90 (d, *J* = 9.9 Hz), 116.89 (d, *J* = 25.3 Hz), 108.39 (d, *J* = 26.8 Hz), 21.82 (s); <sup>19</sup>F NMR (CDCl<sub>3</sub>, 376 MHz, 298 K) δ = -110.50.

HRMS (ESI) *m/z*: calcd for C<sub>14</sub>H<sub>10</sub>FNO<sub>2</sub>S<sub>2</sub> [M + H]<sup>+</sup> 308.0210, found 308.0212.

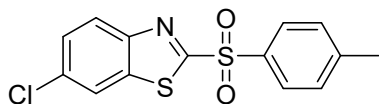

#### 6-chloro-2-tosylbenzo[d]thiazole

**3g:** Flash column chromatography (petroleum/ethyl acetate 4:1) afforded the titled sulfone as a light yellow solid; mp 182.2-184.0 °C; <sup>1</sup>H NMR (500 MHz, CDCl<sub>3</sub>) δ 8.04 (dd, *J* = 8.5, 6.0 Hz, 3H), 7.93 (d, *J* = 1.5 Hz, 1H), 7.52 (dd, *J* = 8.5, 2.0 Hz, 1H), 7.39 (d, *J* = 8.0 Hz, 2H), 2.44 (s, 3H); <sup>13</sup>C NMR (126 MHz, CDCl<sub>3</sub>) δ 168.20, 151.38, 146.23, 138.06, 135.09, 134.08, 130.33, 129.07, 128.59, 126.27, 121.78, 21.84; HRMS (ESI) *m/z*: calcd for C<sub>14</sub>H<sub>10</sub>ClNO<sub>2</sub>S<sub>2</sub> [M + H]<sup>+</sup> 323.9914, found 323.9916.

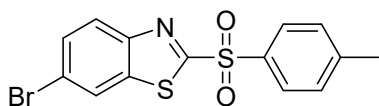

#### 6-bromo-2-tosylbenzo[d]thiazole

**3h:** Flash column chromatography (petroleum/ethyl acetate 4:1) afforded the titled sulfone as a light yellow solid; mp 189.3-189.6 °C; <sup>1</sup>H NMR (500 MHz, CDCl<sub>3</sub>) δ 8.09 (d, *J* = 1.5 Hz, 1H), 8.03 (d, *J* = 8.5 Hz, 2H), 7.98 (d, *J* = 8.5 Hz, 1H), 7.65 (dd, *J* = 8.5, 2.0 Hz, 1H), 7.39 (d, *J* = 8.0 Hz, 2H), 2.44 (s, 3H); <sup>13</sup>C NMR (126 MHz, CDCl<sub>3</sub>) δ 168.22, 151.69, 146.24, 138.44, 135.07, 131.25, 130.34, 129.08, 126.53, 124.76, 121.90, 21.85; HRMS (ESI) *m/z*: calcd for C<sub>14</sub>H<sub>10</sub>BrNO<sub>2</sub>S<sub>2</sub> [M + H]<sup>+</sup> 367.9409, found 367.9408.

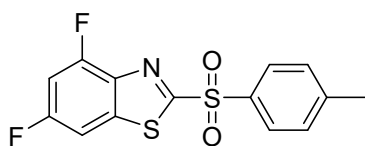

#### 4,6-difluoro-2-tosylbenzo[d]thiazole

**3i:** Flash column chromatography (petroleum/ethyl acetate 4:1) afforded the titled sulfone as a light yellow solid; mp 162.1-163.0 °C; <sup>1</sup>H NMR (500 MHz, CDCl<sub>3</sub>) δ 8.04 (d, *J* = 8.0 Hz, 2H), 7.46 (d, *J* = 7.0 Hz, 1H), 7.40 (d, *J* = 8.0 Hz, 2H), 7.08 (t, *J* = 9.5 Hz, 1H), 2.45 (s, 3H); <sup>13</sup>C NMR (126 MHz, CDCl<sub>3</sub>) δ 167.92 (d, *J* = 3.3 Hz), 162.77 (d, *J* = 10.1 Hz), 160.75 (d, *J* = 10.2 Hz), 157.75 (d, *J* = 13.6 Hz), 155.64 (d, *J*

= 13.7 Hz), 146.39 (s), 139.77 - 139.10 (m), 134.81 (s), 130.36 (s), 129.18 (s), 104.46 - 103.61(m), 21.85 (s);  $^{19}\text{F}$  NMR ( $\text{CDCl}_3$ , 376 MHz, 298 K)  $\delta$  = -106.61, -113.17.  
HRMS (ESI)  $m/z$ : calcd for  $\text{C}_{14}\text{H}_9\text{F}_2\text{NO}_2\text{S}_2$  [ $\text{M} + \text{H}$ ] $^+$  326.0116, found 326.0110.

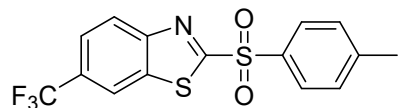

### 2-tosyl-6-(trifluoromethyl)benzo[d]thiazole

**3j**: Flash column chromatography (petroleum/ethyl acetate 4:1) afforded the titled sulfone as a light yellow solid; mp 137.9-138.0 °C;  $^1\text{H}$  NMR (500 MHz,  $\text{CDCl}_3$ )  $\delta$  8.29 – 8.23 (m, 2H), 8.05 (d,  $J$  = 8.5 Hz, 2H), 7.80 (dd,  $J$  = 9.0, 1.5 Hz, 1H), 7.41 (d,  $J$  = 8.0 Hz, 2H), 2.45 (s, 3H);  $^{13}\text{C}$  NMR (126 MHz,  $\text{CDCl}_3$ )  $\delta$  171.05 (s), 154.67 (s), 146.49 (s), 136.91 (s), 134.74 (s), 130.40 (s), 129.82 (q,  $J_{\text{C-F}}$  = 33.4 Hz), 129.21 (s), 126.87 (q,  $J_{\text{C-F}}$  = 273.2 Hz), 126.06 (s), 124.36 (q,  $J_{\text{C-F}}$  = 3.3 Hz), 120.46 (q,  $J_{\text{C-F}}$  = 4.3 Hz), 21.85 (s);  $^{19}\text{F}$  NMR ( $\text{CDCl}_3$ , 376 MHz, 298 K)  $\delta$  = -61.85.

HRMS (ESI)  $m/z$ : calcd for  $\text{C}_{15}\text{H}_{10}\text{F}_3\text{NO}_2\text{S}_2$  [ $\text{M} + \text{H}$ ] $^+$  358.0178, found 358.0158.

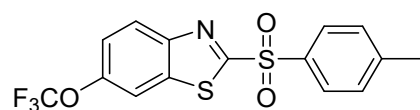

### 2-tosyl-6-(trifluoromethoxy)benzo[d]thiazole

**3k**: Flash column chromatography (petroleum/ethyl acetate 4:1) afforded the titled sulfone as a light yellow solid; mp 124.3-124.7 °C;  $^1\text{H}$  NMR (500 MHz,  $\text{CDCl}_3$ )  $\delta$  8.16 (d,  $J$  = 9.5 Hz, 1H), 8.04 (d,  $J$  = 8.5 Hz, 2H), 7.83 (d,  $J$  = 1.0 Hz, 1H), 7.44 (dd,  $J$  = 9.0, 1.5 Hz, 1H), 7.39 (d,  $J$  = 8.5 Hz, 2H), 2.44 (s, 3H);  $^{13}\text{C}$  NMR (126 MHz,  $\text{CDCl}_3$ )  $\delta$  168.97 (s), 151.22 (s), 148.20 (s), 146.31 (s), 137.90 (s), 135.00 (s), 130.35 (s), 129.09 (s), 126.69 (s), 120.36 ( $J_{\text{C-F}}$  = 259.4 Hz), 121.59 (s), 114.38 (s), 21.82 (s);  $^{19}\text{F}$  NMR ( $\text{CDCl}_3$ , 376 MHz, 298 K)  $\delta$  = -57.94.

HRMS (ESI)  $m/z$ : calcd for  $\text{C}_{15}\text{H}_{10}\text{F}_3\text{NO}_3\text{S}_2$  [ $\text{M} + \text{H}$ ] $^+$  374.0127, found 374.0115.

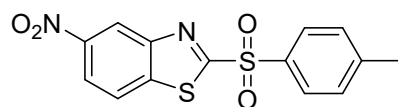

### 5-nitro-2-tosylbenzo[d]thiazole

**3l**: Flash column chromatography (petroleum/ethyl acetate 4:1) afforded the titled sulfone as a light yellow solid; mp 205.9-208.4 °C; <sup>1</sup>H NMR (500 MHz, CDCl<sub>3</sub>) δ 8.99 (d, *J* = 2.0 Hz, 1H), 8.40 (dd, *J* = 9.0, 2.0 Hz, 1H), 8.13 (d, *J* = 9.0 Hz, 1H), 8.06 (d, *J* = 8.5 Hz, 2H), 7.42 (d, *J* = 8.5 Hz, 2H), 2.46 (s, 3H); <sup>13</sup>C NMR (126 MHz, CDCl<sub>3</sub>) δ 171.91, 152.53, 147.50, 146.76, 142.73, 134.40, 130.47, 129.32, 123.19, 121.98, 121.01, 21.89; HRMS (ESI) *m/z*: calcd for C<sub>14</sub>H<sub>10</sub>N<sub>2</sub>O<sub>4</sub>S<sub>2</sub> [M + H]<sup>+</sup> 335.0155, found 335.0140.

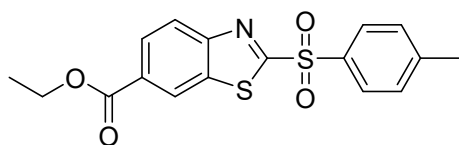

ethyl 2-tosylbenzo[d]thiazole-6-carboxylate

**3m**: Flash column chromatography (petroleum/ethyl acetate 4:1) afforded the titled sulfone as a light yellow solid; mp 148.5-150.6 °C; <sup>1</sup>H NMR (500 MHz, CDCl<sub>3</sub>) δ 8.69 (s, 1H), 8.23 (dd, *J* = 9.0, 1.5 Hz, 1H), 8.17 (d, *J* = 8.5 Hz, 1H), 8.05 (d, *J* = 8.5 Hz, 2H), 7.40 (d, *J* = 8.5 Hz, 2H), 4.43 (q, *J* = 7.5 Hz, 2H), 2.44 (s, 3H), 1.43 (t, *J* = 7.5 Hz, 3H); <sup>13</sup>C NMR (126 MHz, CDCl<sub>3</sub>) δ 170.93, 165.42, 155.45, 146.35, 136.77, 134.88, 130.36, 129.74, 129.19, 128.34, 125.23, 124.46, 61.77, 21.85, 14.34; HRMS (ESI) *m/z*: calcd for C<sub>17</sub>H<sub>15</sub>NO<sub>4</sub>S<sub>2</sub> [M + H]<sup>+</sup> 362.0515, found 362.0502.

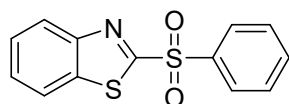

2-(phenylsulfonyl)benzo[d]thiazole

**4a<sup>4</sup>**: Flash column chromatography (petroleum/ethyl acetate 4:1) afforded the titled sulfone as a light yellow solid; mp 157.8-158.6 °C; <sup>13</sup>C NMR (126 MHz, CDCl<sub>3</sub>) δ 167.22, 152.91, 138.41, 137.06, 134.67, 129.61, 128.98, 127.97, 127.60, 125.58, 122.29.

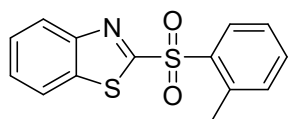

2-(o-tolylsulfonyl)benzo[d]thiazole



**4b:** Flash column chromatography (petroleum/ethyl acetate 4:1) afforded the titled sulfone as a light yellow solid; mp 116.8-116.9 °C; <sup>1</sup>H NMR (500 MHz, CDCl<sub>3</sub>) δ 8.29 (d, *J* = 8.0 Hz, 1H), 8.14 (d, *J* = 8.0 Hz, 1H), 7.96 (d, *J* = 7.5 Hz, 1H), 7.59 - 7.52 (m, 3H), 7.44 (t, *J* = 8.0 Hz, 1H), 7.32 (d, *J* = 7.5 Hz, 1H), 2.74 (s, 3H); <sup>13</sup>C NMR (126 MHz, CDCl<sub>3</sub>) δ 167.63, 152.66, 139.75, 136.88, 136.62, 134.82, 132.99, 130.78, 127.91, 127.52, 126.91, 125.56, 122.22, 20.90; HRMS (ESI) *m/z*: calcd for C<sub>14</sub>H<sub>11</sub>NO<sub>2</sub>S<sub>2</sub> [M + H]<sup>+</sup> 290.0304, found 290.0296.

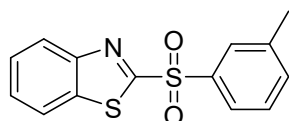

#### 2-(*m*-tolylsulfonyl)benzo[*d*]thiazole

**4c:** Flash column chromatography (petroleum/ethyl acetate 4:1) afforded the titled sulfone as a light yellow solid; mp 140.9-141.1 °C; <sup>1</sup>H NMR (500 MHz, CDCl<sub>3</sub>) δ 8.16 (d, *J* = 8.0 Hz, 1H), 7.96 (d, *J* = 8.0 Hz, 3H), 7.60 – 7.52 (m, 2H), 7.50 – 7.43 (m, 2H), 2.44 (s, 3H); <sup>13</sup>C NMR (126 MHz, CDCl<sub>3</sub>) δ 167.43, 152.92, 139.97, 138.25, 137.08, 135.49, 129.44, 129.18, 127.89, 127.53, 126.14, 125.57, 122.25, 21.38; HRMS (ESI) *m/z*: calcd for C<sub>14</sub>H<sub>11</sub>NO<sub>2</sub>S<sub>2</sub> [M + H]<sup>+</sup> 290.0304, found 290.0293.

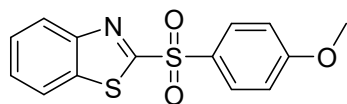

#### 2-((4-methoxyphenyl)sulfonyl)benzo[*d*]thiazole

**4d:** Flash column chromatography (petroleum/ethyl acetate 4:1) afforded the titled sulfone as a light yellow solid; mp 118.1-119.7 °C; <sup>1</sup>H NMR (500 MHz, CDCl<sub>3</sub>) δ 8.14 (d, *J* = 8.0 Hz, 1H), 8.09 (d, *J* = 9.0 Hz, 2H), 7.95 (d, *J* = 8.0 Hz, 1H), 7.54 (dt, *J* = 22.0, 7.5 Hz, 2H), 7.03 (d, *J* = 9.0 Hz, 2H), 3.87 (s, 3H); <sup>13</sup>C NMR (126 MHz, CDCl<sub>3</sub>) δ 168.02, 164.59, 152.88, 136.94, 131.35, 129.59, 127.76, 127.46, 125.45, 122.23, 114.88, 55.83; HRMS (ESI) *m/z*: calcd for C<sub>14</sub>H<sub>11</sub>NO<sub>3</sub>S<sub>2</sub> [M + H]<sup>+</sup> 306.0253, found 306.0237.

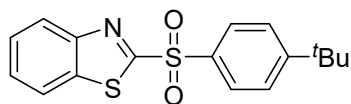

### 2-((4-(*tert*-butyl)phenyl)sulfonyl)benzo[*d*]thiazole

**4e**: Flash column chromatography (petroleum/ethyl acetate 4:1) afforded the titled sulfone as a light yellow solid; mp 204.5-206.4 °C; <sup>1</sup>H NMR (500 MHz, CDCl<sub>3</sub>) δ 8.17 (d, *J* = 8.0 Hz, 1H), 8.08 (d, *J* = 8.5 Hz, 2H), 7.96 (d, *J* = 8.0 Hz, 1H), 7.67 – 7.42 (m, 4H), 1.32 (s, 9H); <sup>13</sup>C NMR (126 MHz, CDCl<sub>3</sub>) δ 167.62, 158.78, 152.92, 137.08, 135.29, 128.85, 127.85, 127.52, 126.71, 125.55, 122.27, 35.43, 31.00; HRMS (ESI) *m/z*: calcd for C<sub>17</sub>H<sub>17</sub>NO<sub>2</sub>S<sub>2</sub> [M + H]<sup>+</sup> 332.0773, found 332.0756.

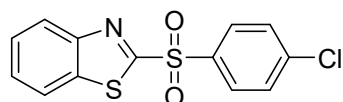

### 2-((4-chlorophenyl)sulfonyl)benzo[*d*]thiazole

**4f**: Flash column chromatography (petroleum/ethyl acetate 4:1) afforded the titled sulfone as a light yellow solid; mp 160.7-161.0 °C; <sup>1</sup>H NMR (500 MHz, CDCl<sub>3</sub>) δ 8.16 (d, *J* = 8.0 Hz, 1H), 8.11 (d, *J* = 9.0 Hz, 2H), 7.98 (d, *J* = 7.5 Hz, 1H), 7.63 – 7.52 (m, 4H); <sup>13</sup>C NMR (126 MHz, CDCl<sub>3</sub>) δ 166.75, 152.90, 141.61, 137.02, 136.82, 130.45, 129.97, 128.12, 127.71, 125.58, 122.31.

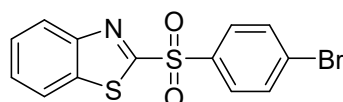

### 2-((4-bromophenyl)sulfonyl)benzo[*d*]thiazole

**4g**: Flash column chromatography (petroleum/ethyl acetate 4:1) afforded the titled sulfone as a light yellow solid; mp 166.9-168.8 °C; <sup>1</sup>H NMR (500 MHz, CDCl<sub>3</sub>) δ 8.15 (d, *J* = 7.5 Hz, 1H), 8.02 (dd, *J* = 8.9, 2.0 Hz, 2H), 7.99 – 7.95 (m, 1H), 7.72 (dd, *J* = 9.0, 2.0 Hz, 2H), 7.62 - 7.53 (m, 2H); <sup>13</sup>C NMR (126 MHz, CDCl<sub>3</sub>) δ 166.71, 152.90, 137.42, 137.01, 132.94, 130.45, 130.30, 128.11, 127.71, 125.60, 122.30; HRMS (ESI) *m/z*: calcd for C<sub>13</sub>H<sub>8</sub>BrNO<sub>2</sub>S<sub>2</sub> [M + H]<sup>+</sup> 353.9253, found 353.9248.

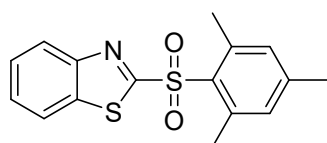

### 2-(mesitylsulfonyl)benzo[*d*]thiazole

**4h**: Flash column chromatography (petroleum/ethyl acetate 4:1) afforded the titled sulfone as a light yellow solid; mp 133.6-134.7 °C; <sup>1</sup>H NMR (500 MHz, CDCl<sub>3</sub>) δ 8.12 (d, *J* = 7.5 Hz, 1H), 7.96 (d, *J* = 8.0 Hz, 1H), 7.55 (dt, *J* = 19.5, 7.5 Hz, 2H), 7.00 (s, 2H), 2.78 (s, 6H), 2.31 (s, 3H); <sup>13</sup>C NMR (126 MHz, CDCl<sub>3</sub>) δ 168.93, 152.58, 144.79, 141.63, 136.47, 132.47, 132.35, 127.67, 127.34, 125.47, 122.14, 23.27, 21.22; HRMS (ESI) *m/z*: calcd for C<sub>16</sub>H<sub>15</sub>NO<sub>2</sub>S<sub>2</sub> [M + H]<sup>+</sup> 318.0617, found 318.0612.

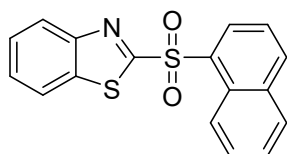

#### 2-(naphthalen-1-ylsulfonyl)benzo[d]thiazole

**4i**: Flash column chromatography (petroleum/ethyl acetate 4:1) afforded the titled sulfone as a light yellow solid; mp 202.6 - 204.9 °C; <sup>1</sup>H NMR (500 MHz, CDCl<sub>3</sub>) δ 8.99 (d, *J* = 9.0 Hz, 1H), 8.65 (dd, *J* = 7.5, 1.0 Hz, 1H), 8.17 (d, *J* = 8.0 Hz, 1H), 8.10 (dd, *J* = 8.0, 1.0 Hz, 1H), 7.93 (dd, *J* = 7.0, 1.0 Hz, 2H), 7.71 – 7.65 (m, 2H), 7.60 – 7.49 (m, 3H); <sup>13</sup>C NMR (126 MHz, CDCl<sub>3</sub>) δ 167.44, 152.56, 137.05, 136.53, 134.22, 133.65, 131.68, 129.10, 128.92, 128.91, 127.88, 127.46, 127.26, 125.61, 124.86, 124.61, 122.17; HRMS (ESI) *m/z*: calcd for C<sub>17</sub>H<sub>11</sub>NO<sub>2</sub>S<sub>2</sub> [M + H]<sup>+</sup> 326.0304, found 326.0308.

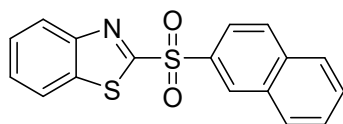

#### 2-(naphthalen-2-ylsulfonyl)benzo[d]thiazole

**4j<sup>5</sup>**: Flash column chromatography (petroleum/ethyl acetate 4:1) afforded the titled sulfone as a light yellow solid; mp 153.9-156.4 °C; <sup>13</sup>C NMR (126 MHz, CDCl<sub>3</sub>) δ 167.31, 152.92, 137.06, 135.68, 135.18, 132.18, 131.17, 129.96, 129.91, 129.73, 128.06, 127.94, 127.92, 127.57, 125.57, 123.15, 122.26.

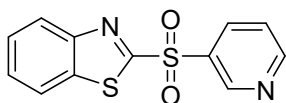

#### 2-(pyridin-3-ylsulfonyl)benzo[d]thiazole

**4k**: Flash column chromatography (petroleum/ethyl acetate 4:1) afforded the titled sulfone as a light yellow solid; mp 172.1-172.6 °C; <sup>1</sup>H NMR (500 MHz, CDCl<sub>3</sub>) δ 9.36 (s, 1H), 8.90 (s, 1H), 8.47 (d, *J* = 7.5 Hz, 1H), 8.18 – 8.14 (m, 1H), 8.02 – 7.97 (m, 1H), 7.63-7.54 (m, 3H); <sup>13</sup>C NMR (126 MHz, CDCl<sub>3</sub>) δ 166.24, 154.87, 152.89, 149.76, 137.01, 136.64, 135.36, 128.32, 127.84, 125.68, 124.14, 122.37; HRMS (ESI) *m/z*: calcd for C<sub>12</sub>H<sub>8</sub>N<sub>2</sub>O<sub>2</sub>S<sub>2</sub> [M + H]<sup>+</sup> 277.0100, found 277.0086.

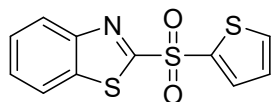

#### 2-(thiophen-2-ylsulfonyl)benzo[d]thiazole

**4l**: Flash column chromatography (petroleum/ethyl acetate 4:1) afforded the titled sulfone as a light yellow solid; mp 173.6-174.0 °C; <sup>1</sup>H NMR (500 MHz, CDCl<sub>3</sub>) δ 8.18 (d, *J* = 8.0 Hz, 1H), 7.99 - 7.95 (m, 2H), 7.81 (dd, *J* = 5.0, 1.0 Hz, 1H), 7.63 - 7.52 (m, 2H), 7.18 (dd, *J* = 5.0, 4.0 Hz, 1H); <sup>13</sup>C NMR (126 MHz, CDCl<sub>3</sub>) δ 167.18, 152.73, 138.89, 137.10, 136.52, 136.21, 128.50, 128.03, 127.64, 125.62, 122.29; HRMS (ESI) *m/z*: calcd for C<sub>11</sub>H<sub>7</sub>NO<sub>2</sub>S<sub>3</sub> [M + H]<sup>+</sup> 281.9712, found 281.9717.

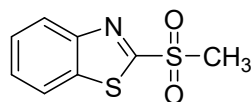

#### 2-(methylsulfonyl)benzo[d]thiazole

**4m<sup>2</sup>**: Flash column chromatography (petroleum/ethyl acetate 4:1) afforded the titled sulfone as a light yellow solid; mp 166.7-167.0 °C; <sup>1</sup>H NMR (500 MHz, CDCl<sub>3</sub>) δ 8.22 (d, *J* = 8.0 Hz, 1H), 8.03 (d, *J* = 8.0 Hz, 1H), 7.63 (dt, *J* = 24.0, 7.0 Hz, 2H), 3.42 (s, 3H); <sup>13</sup>C NMR (126 MHz, CDCl<sub>3</sub>) δ 166.36, 152.46, 136.62, 128.16, 127.77, 125.43, 122.44, 42.48.

#### 4. $^1\text{H}$ NMR, $^{13}\text{C}$ NMR and $^{19}\text{F}$ NMR for the sulfone products.

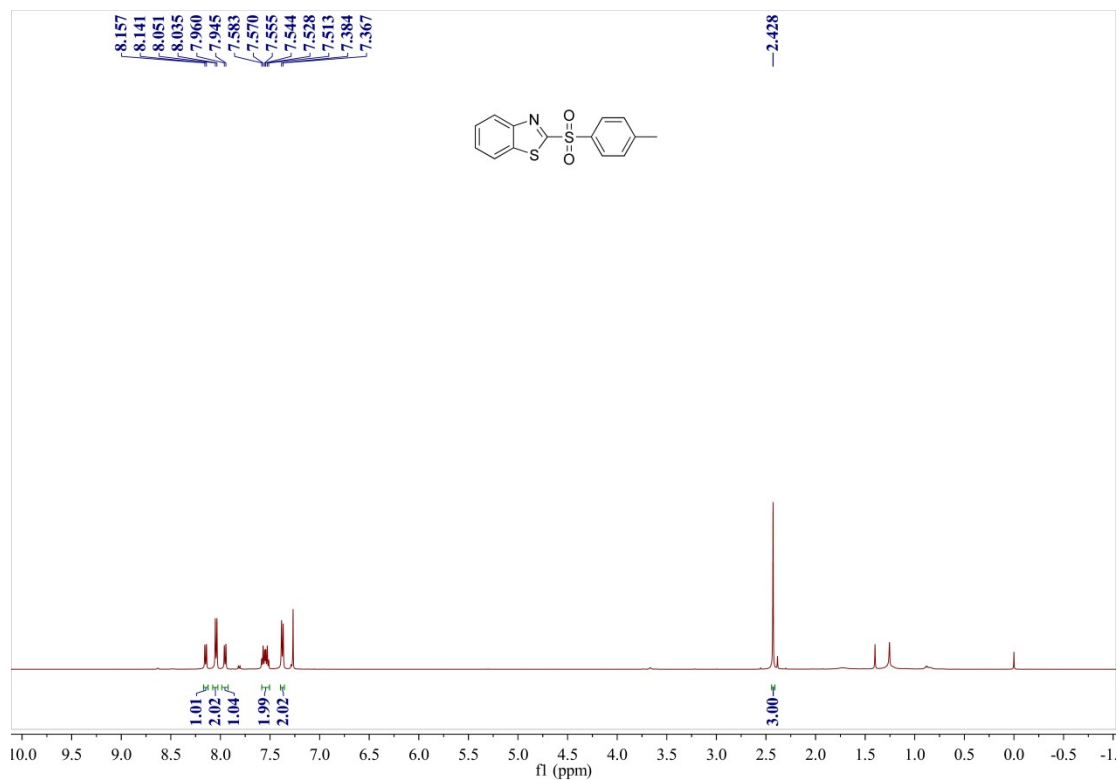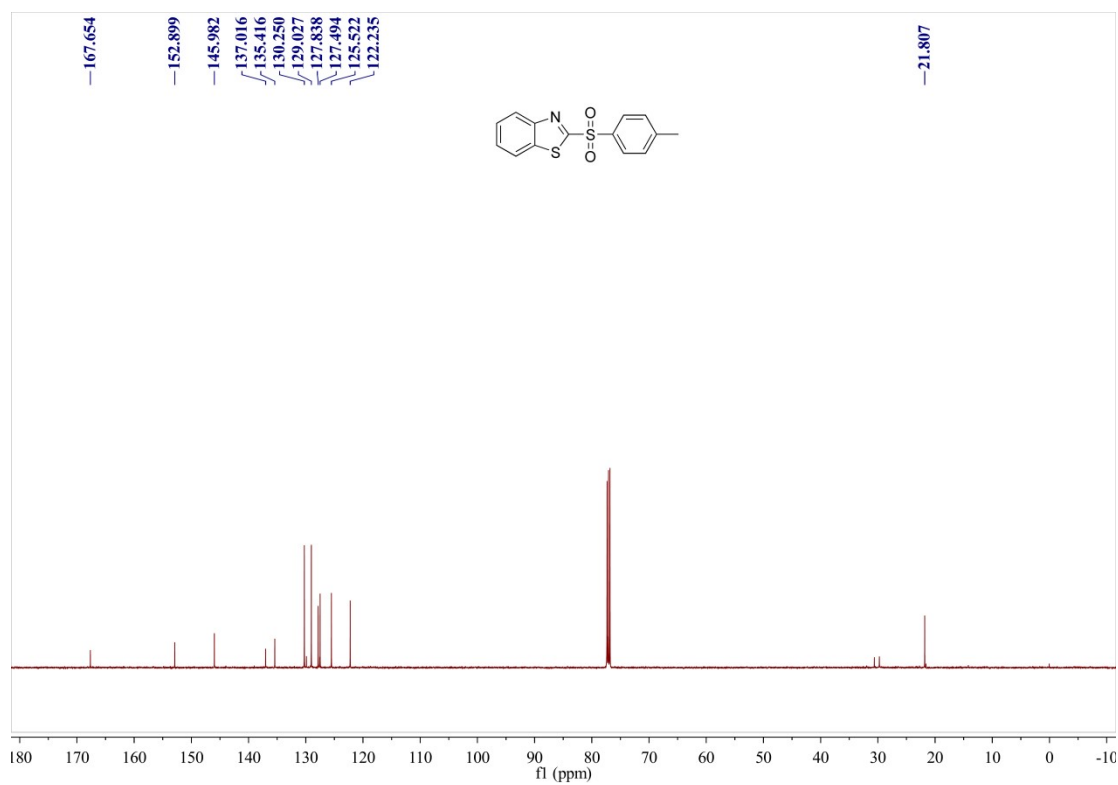

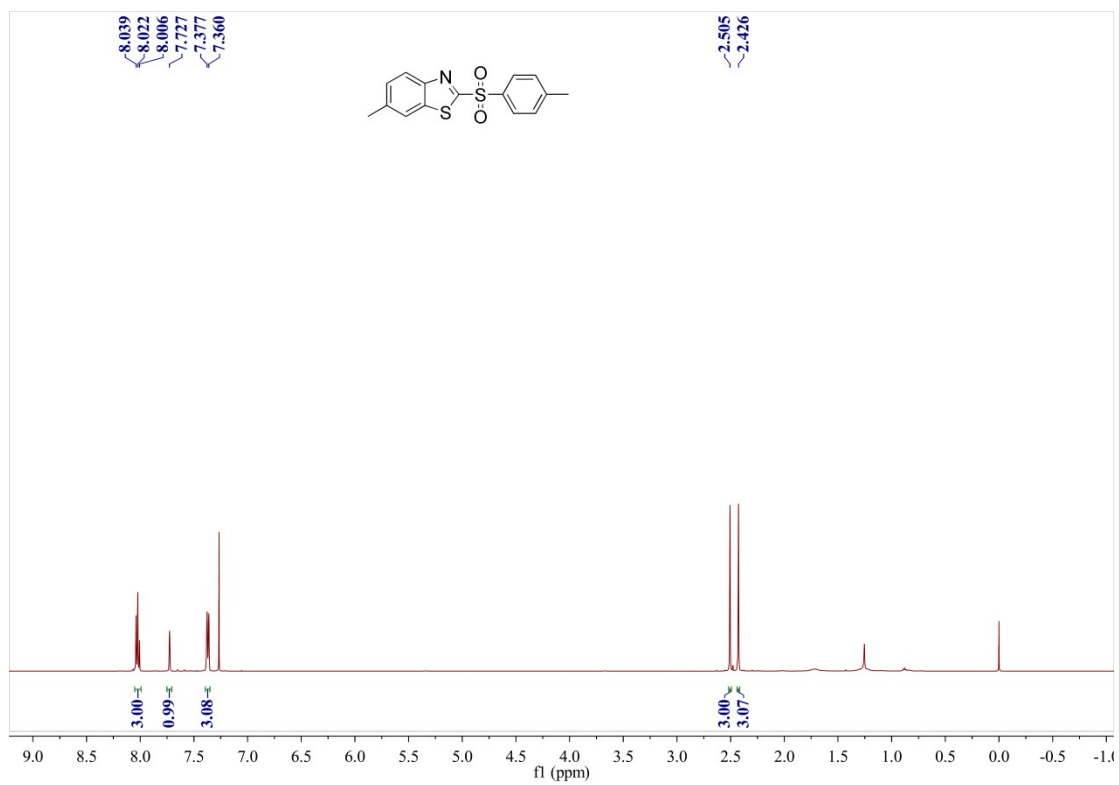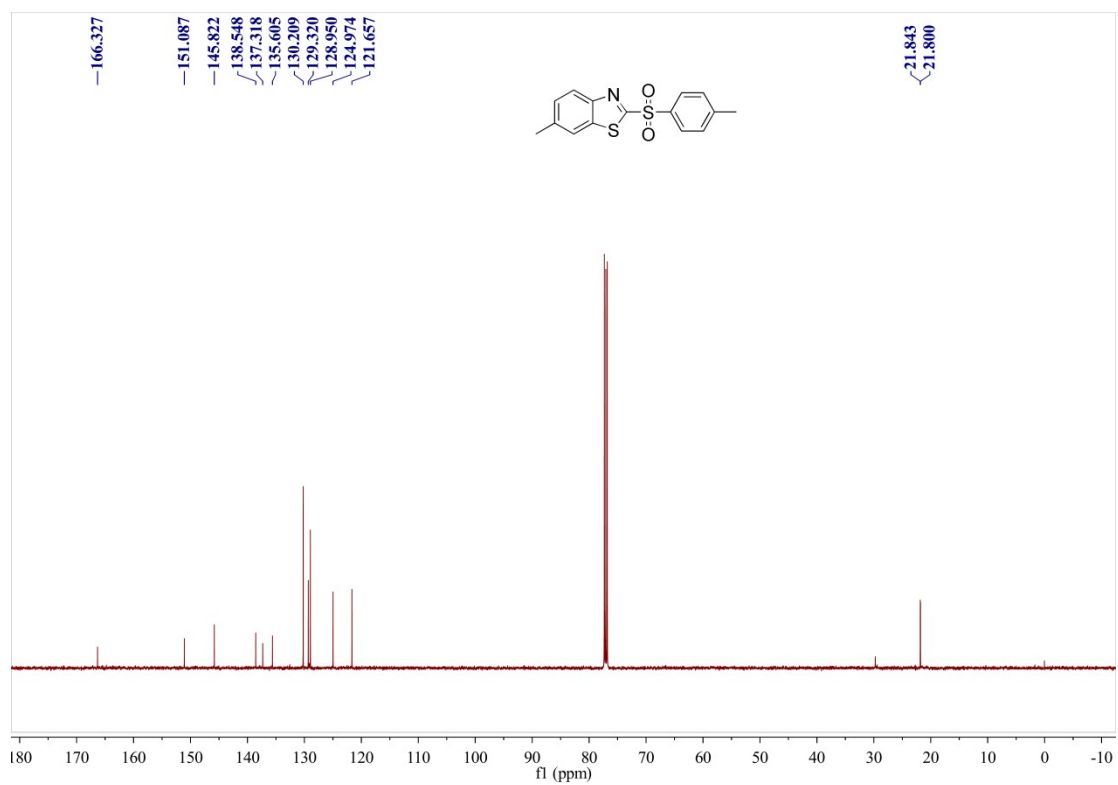

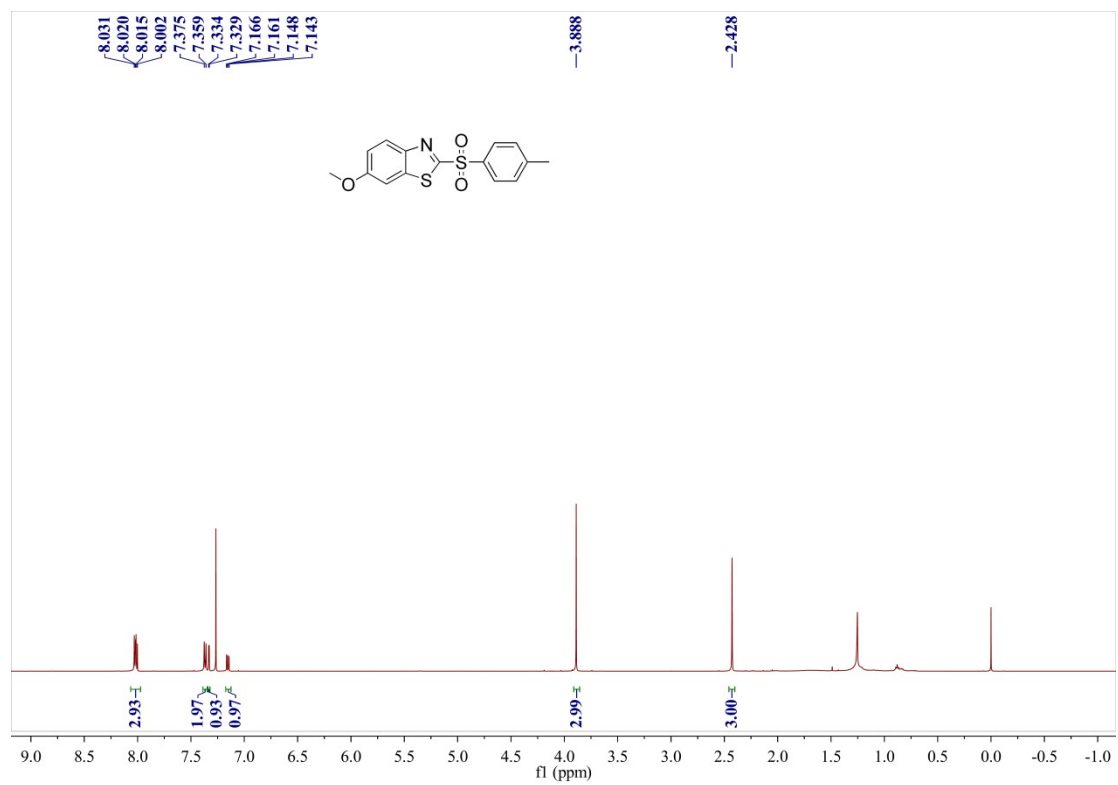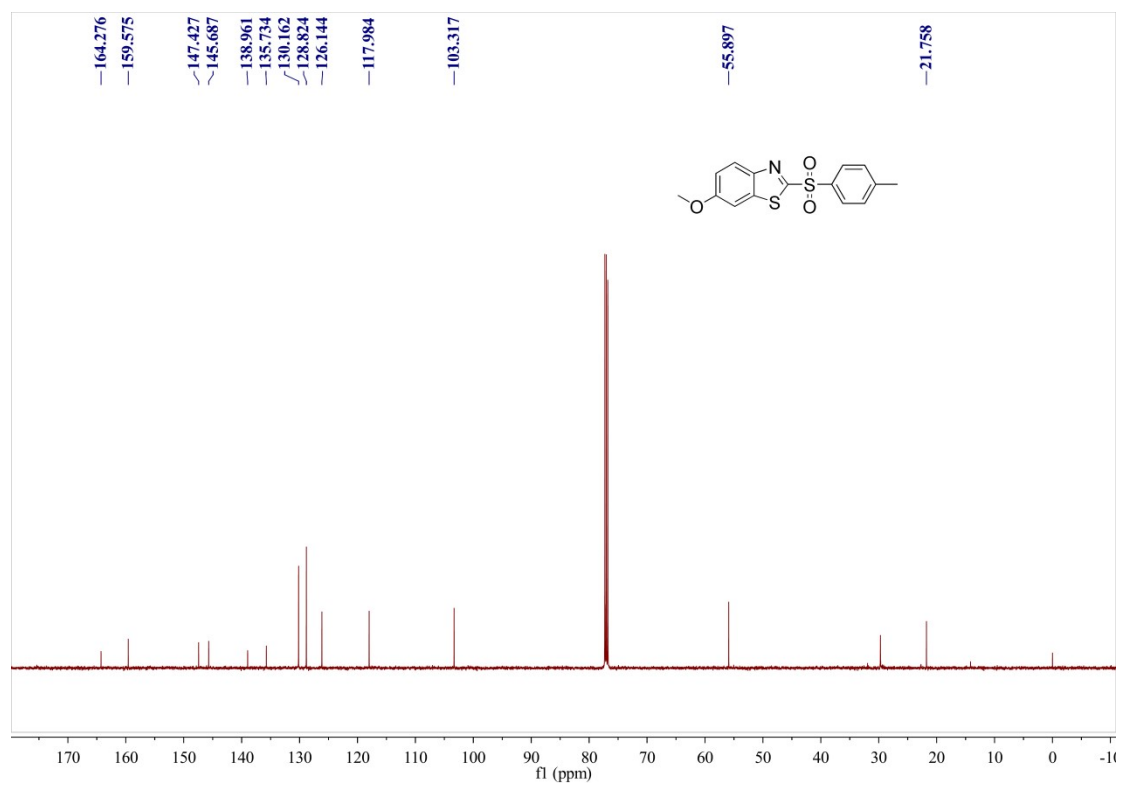

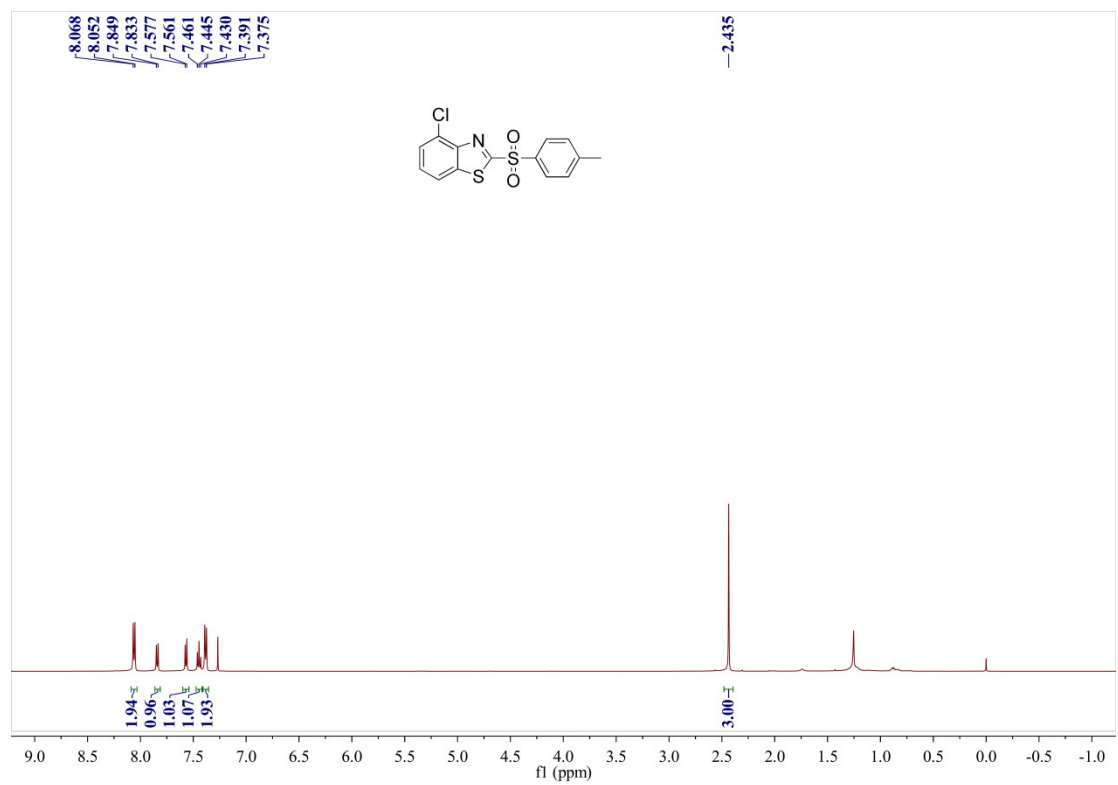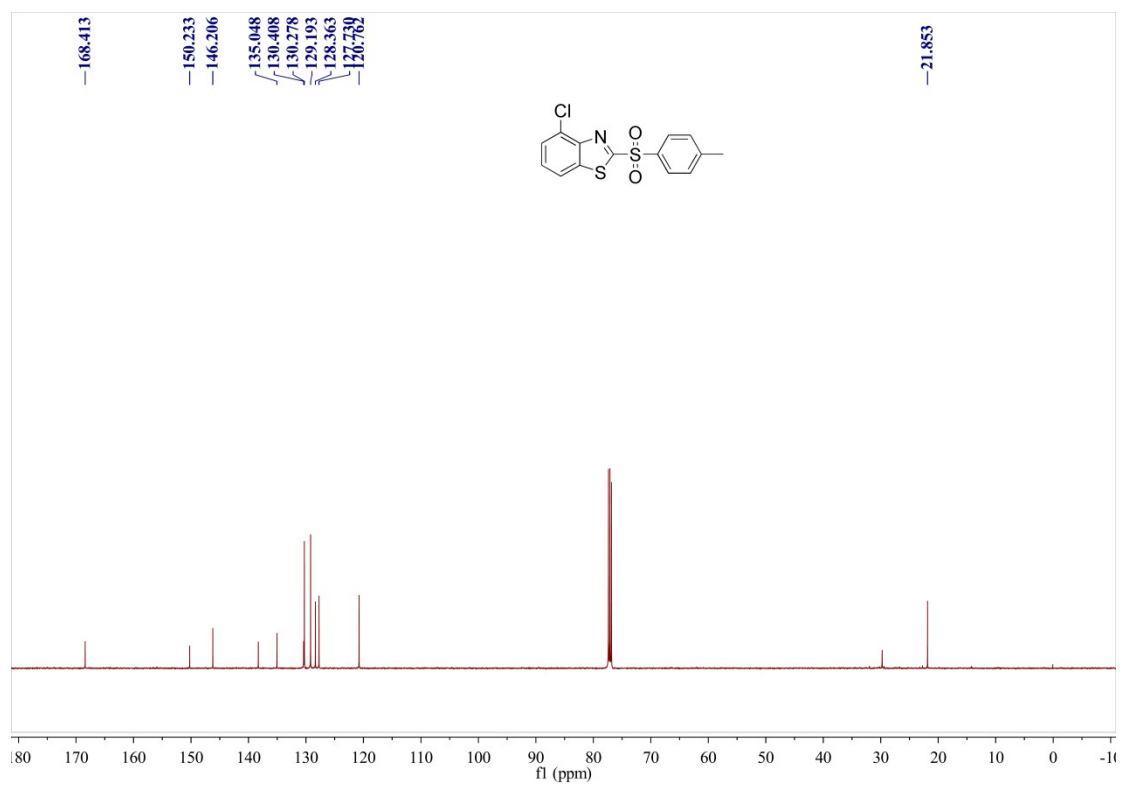



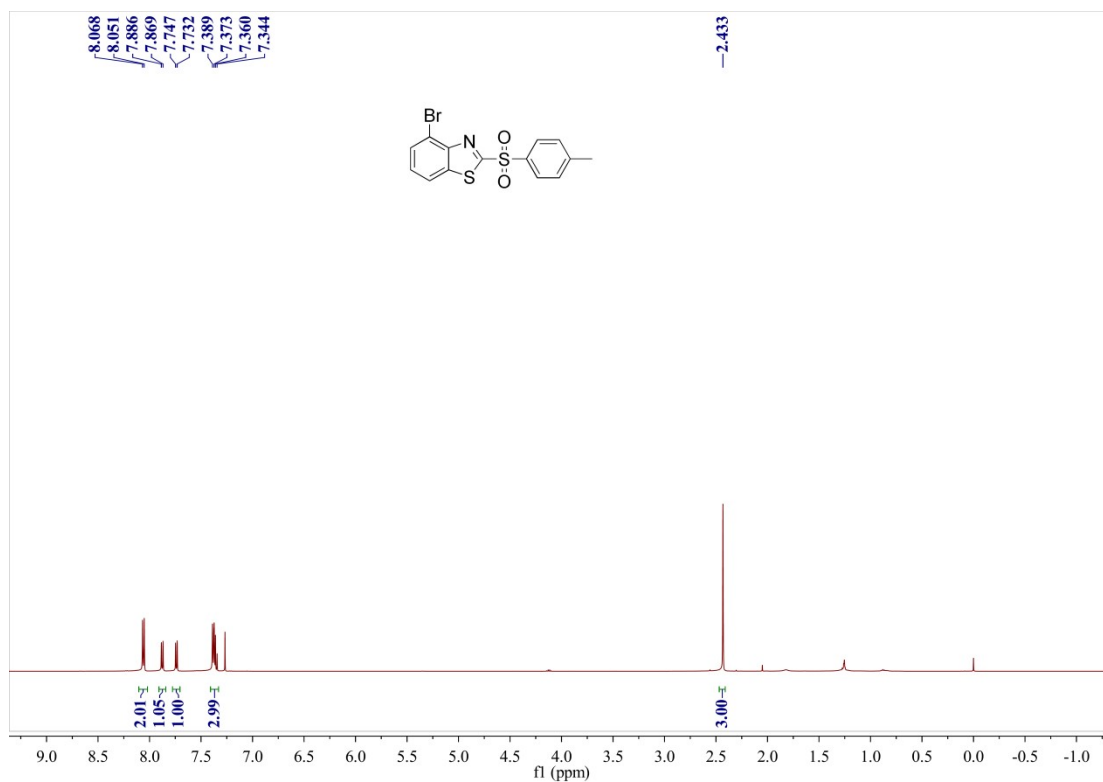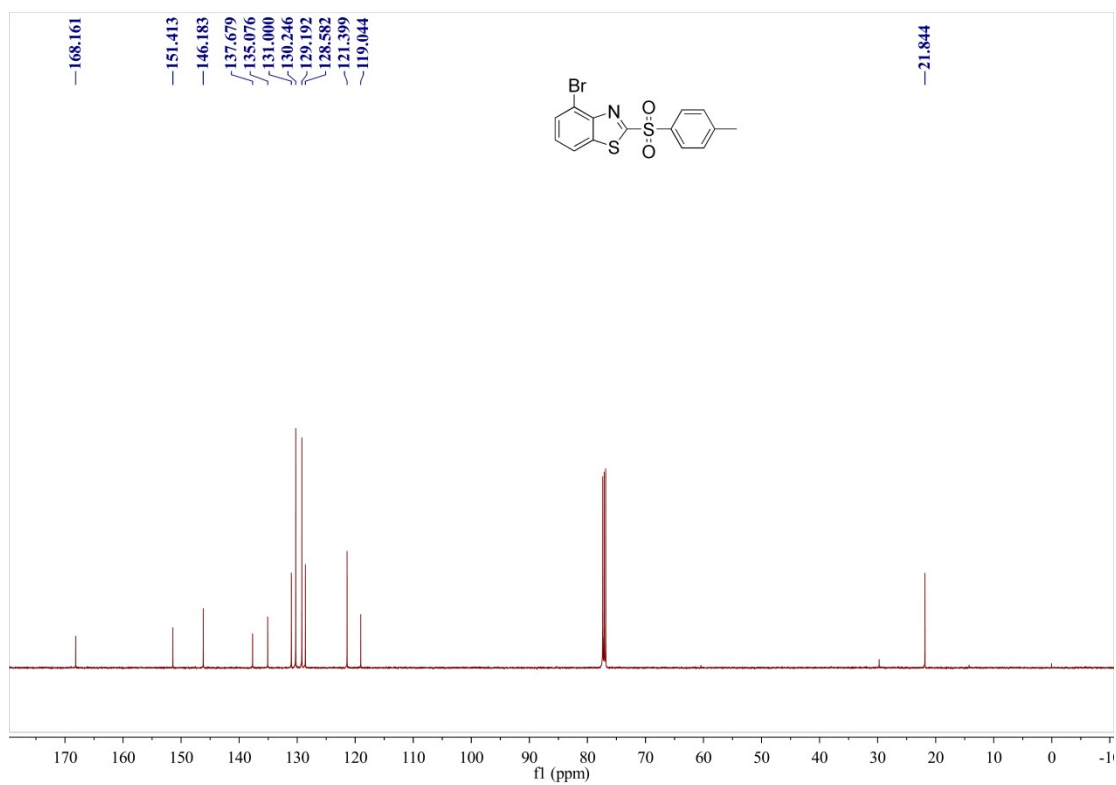

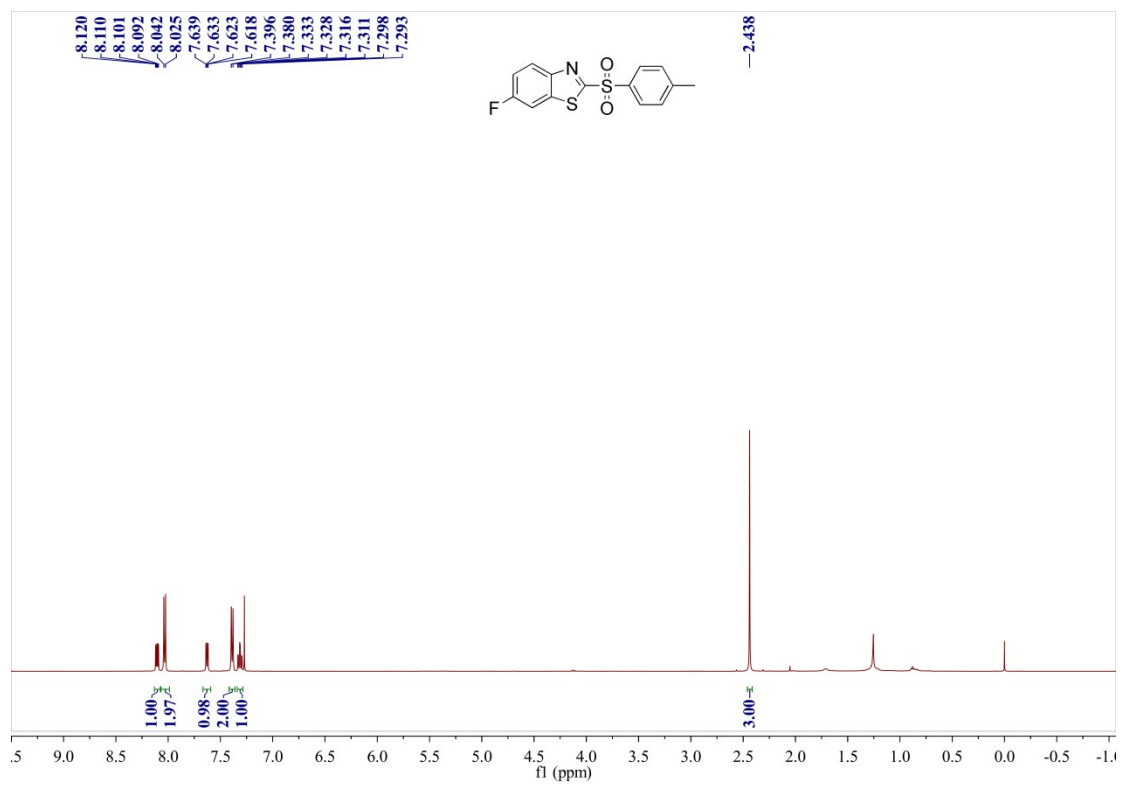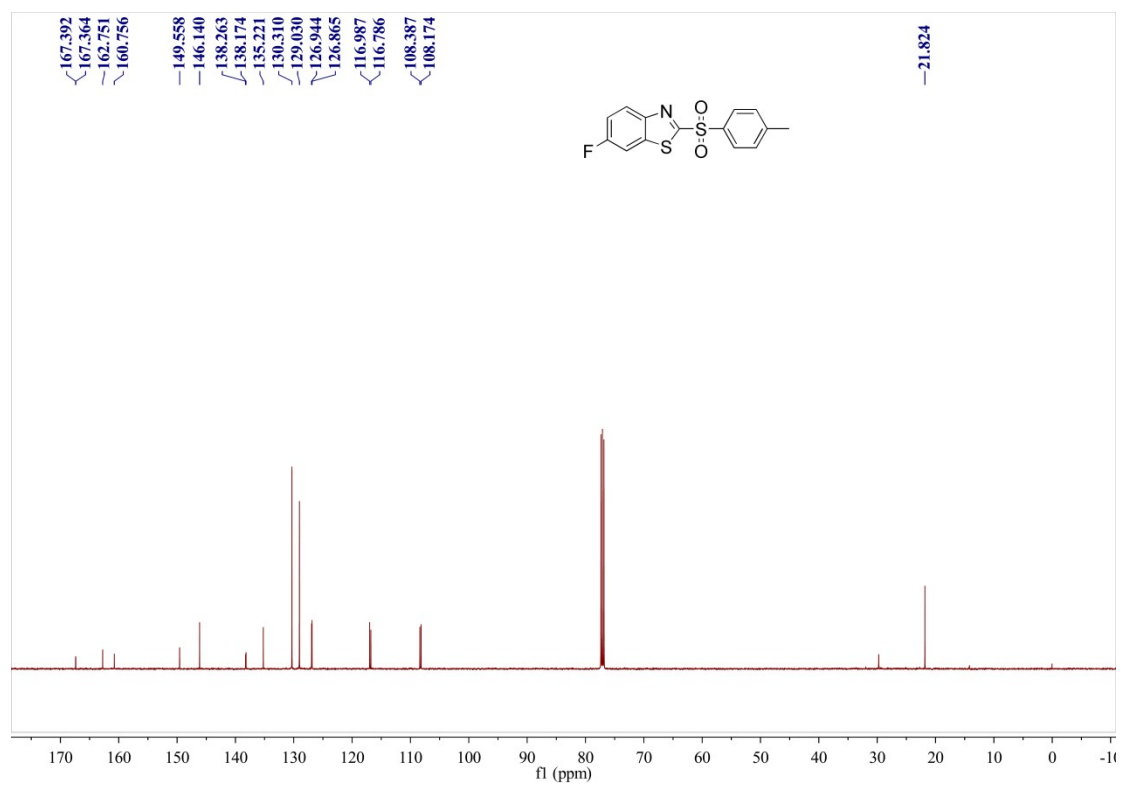

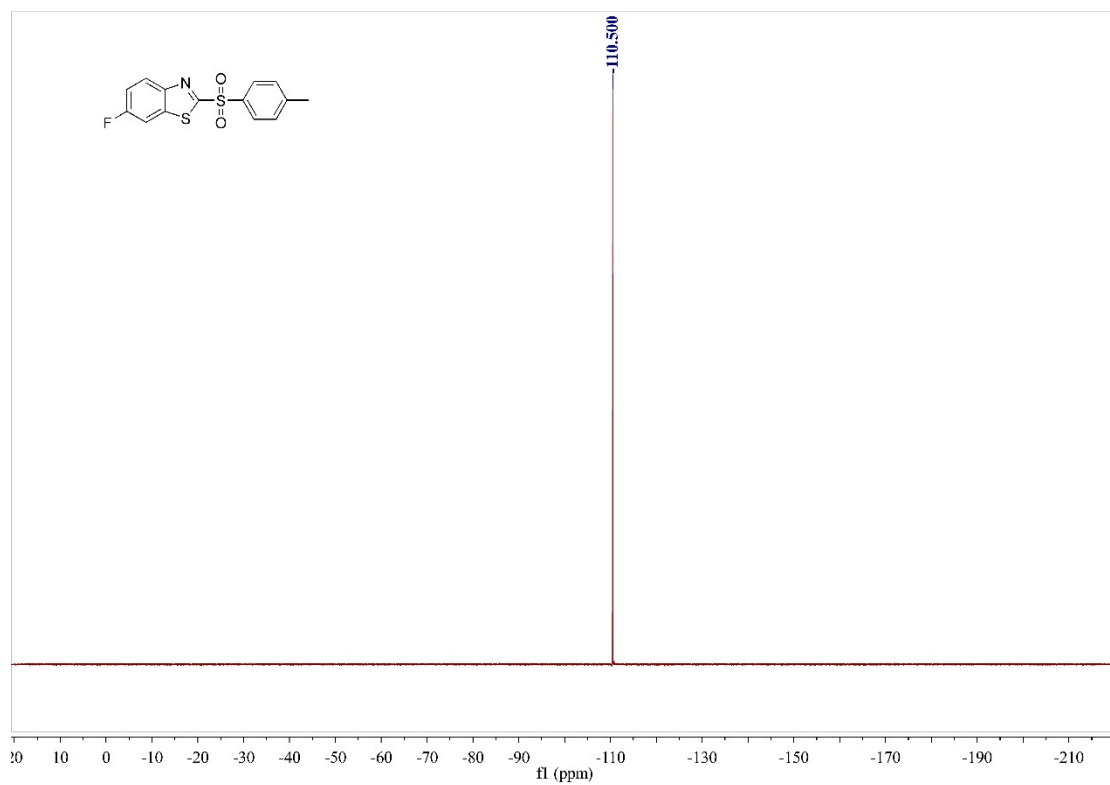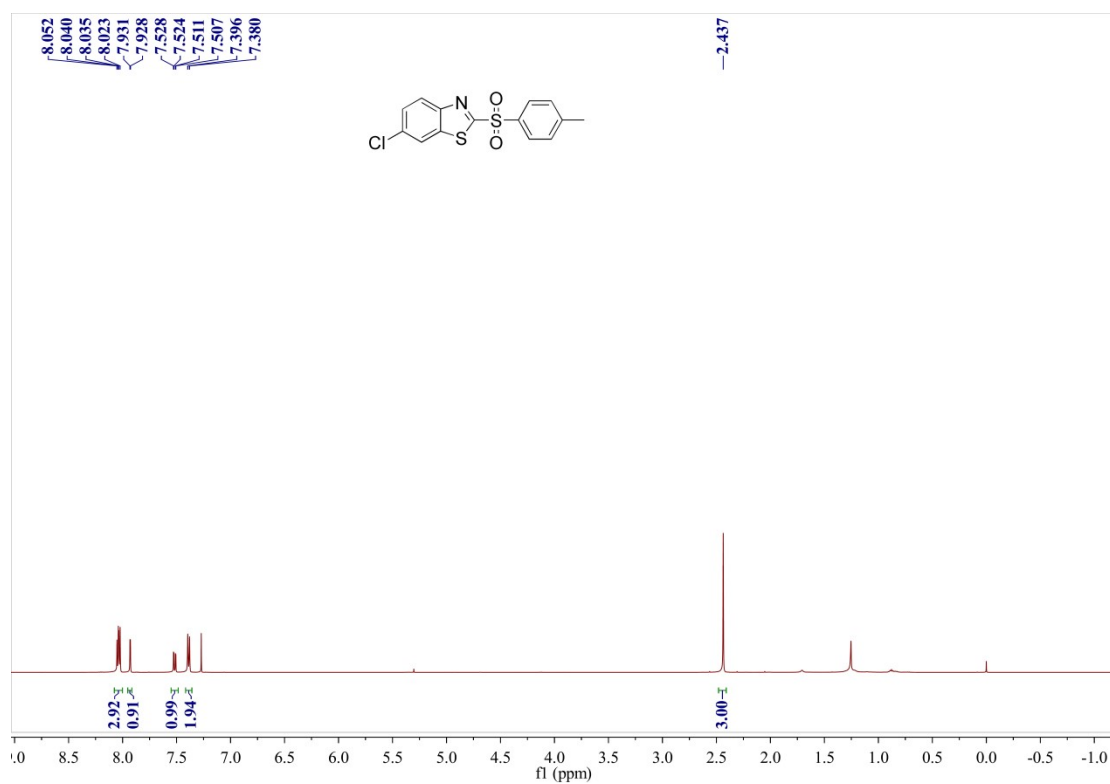

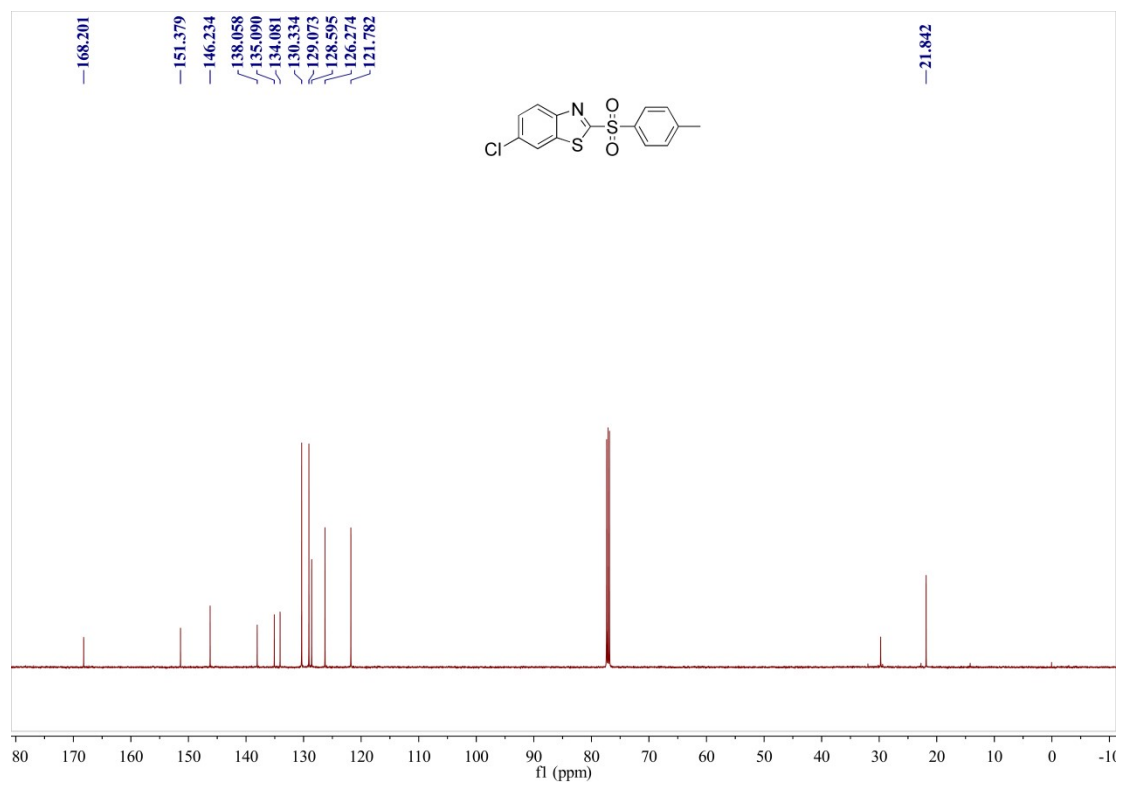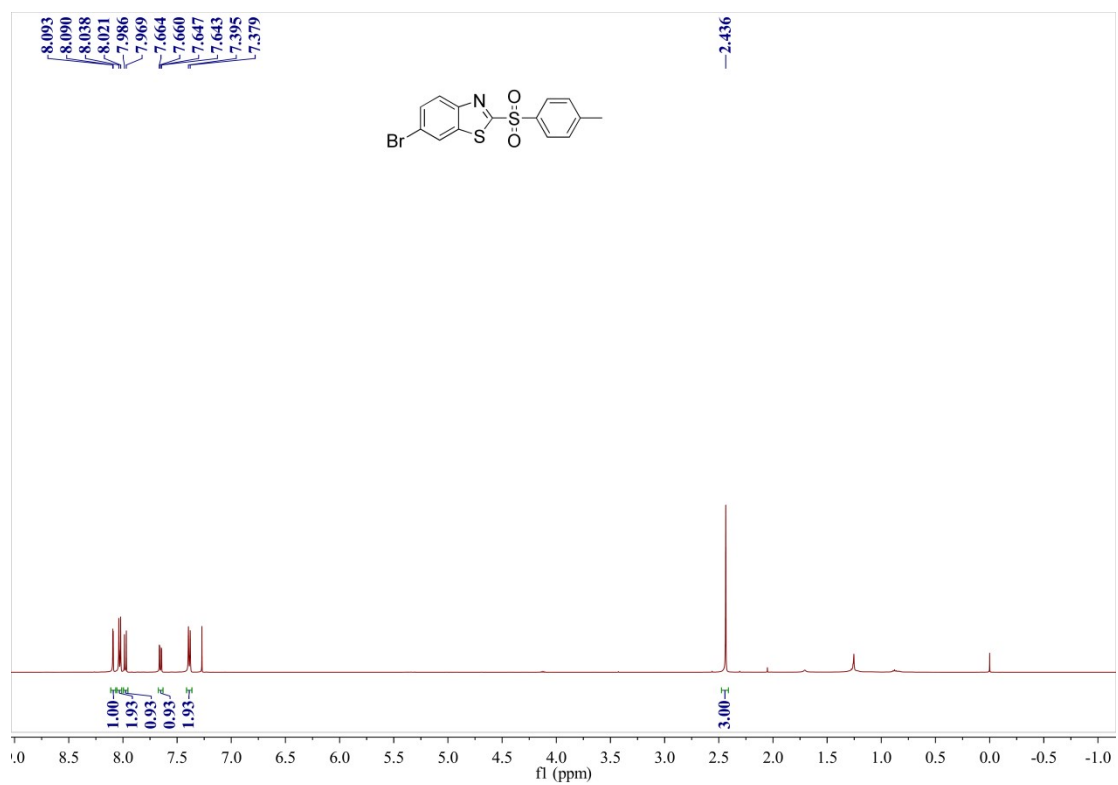

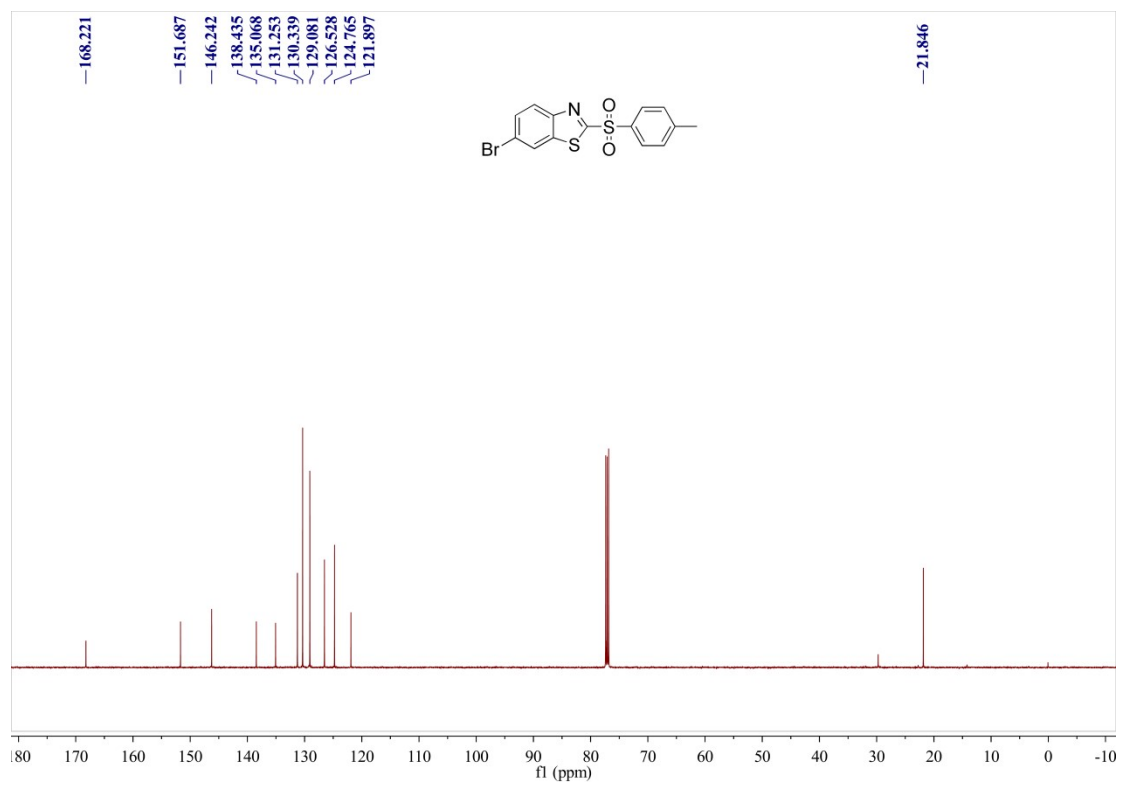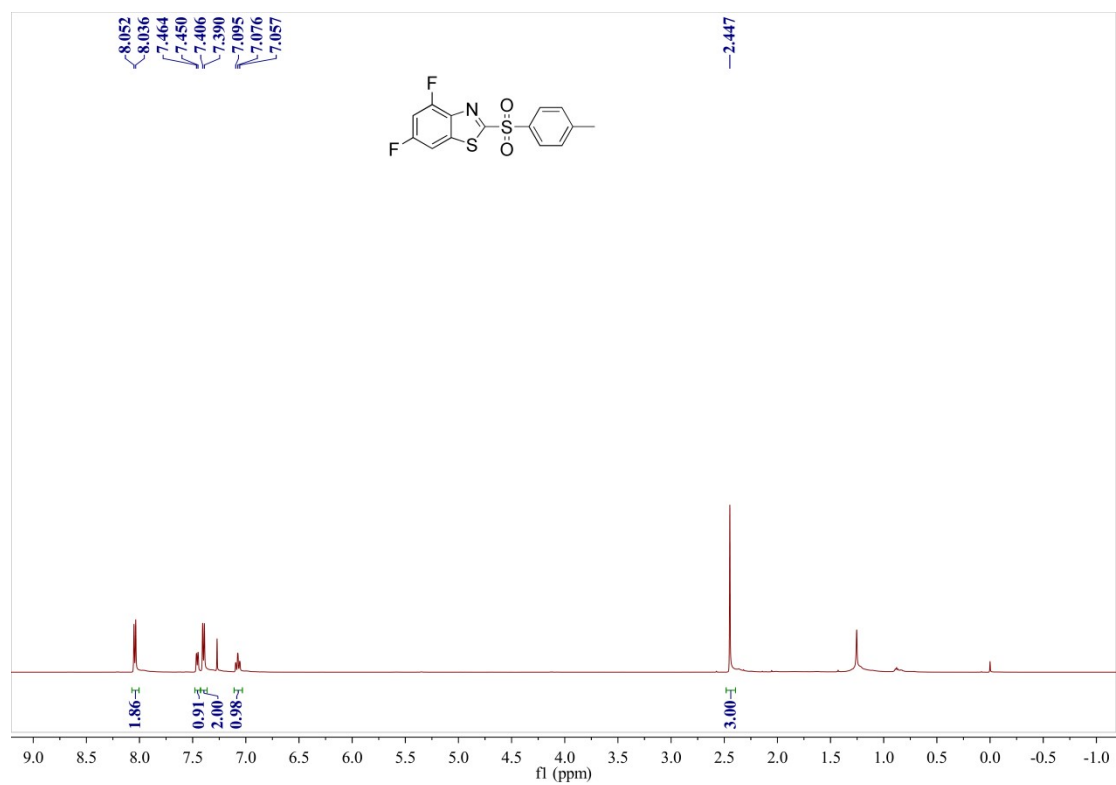

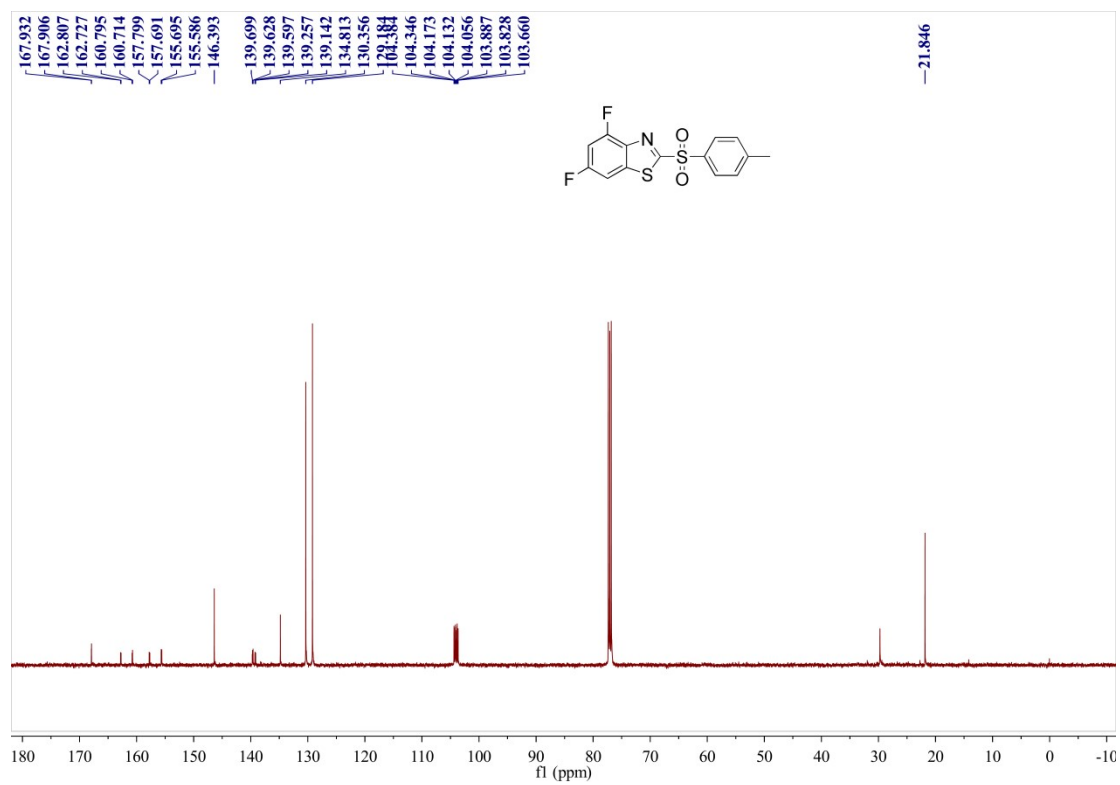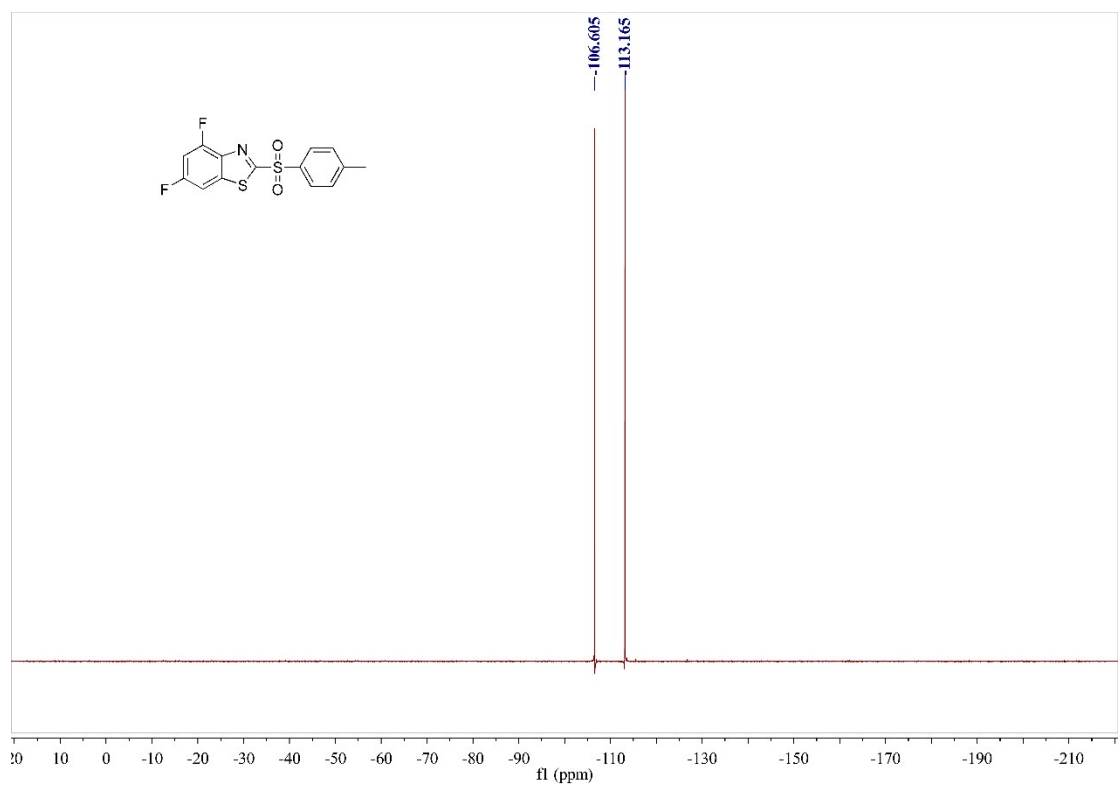

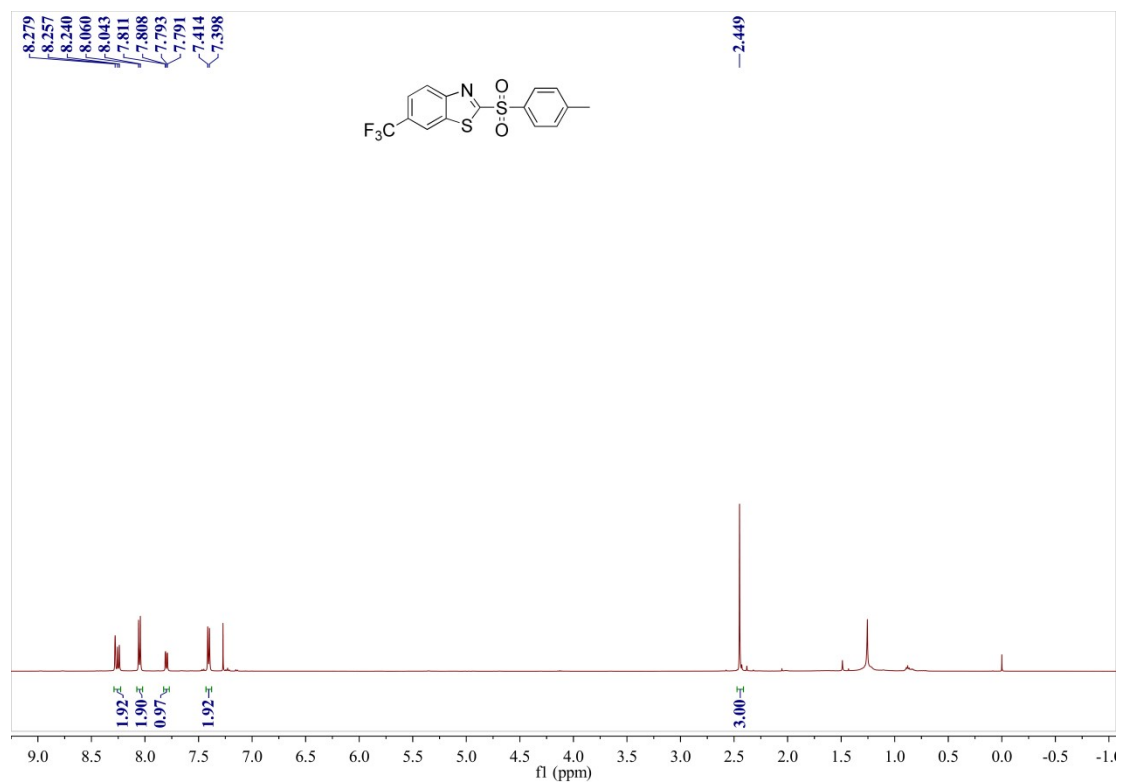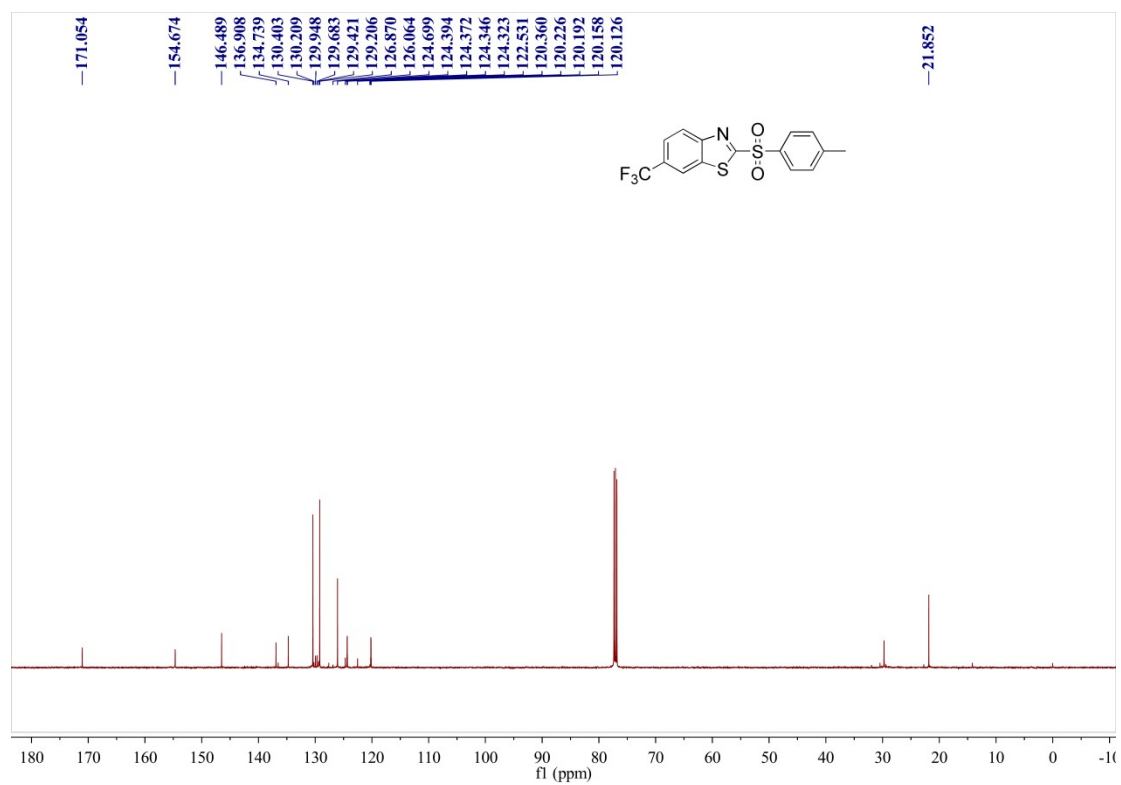

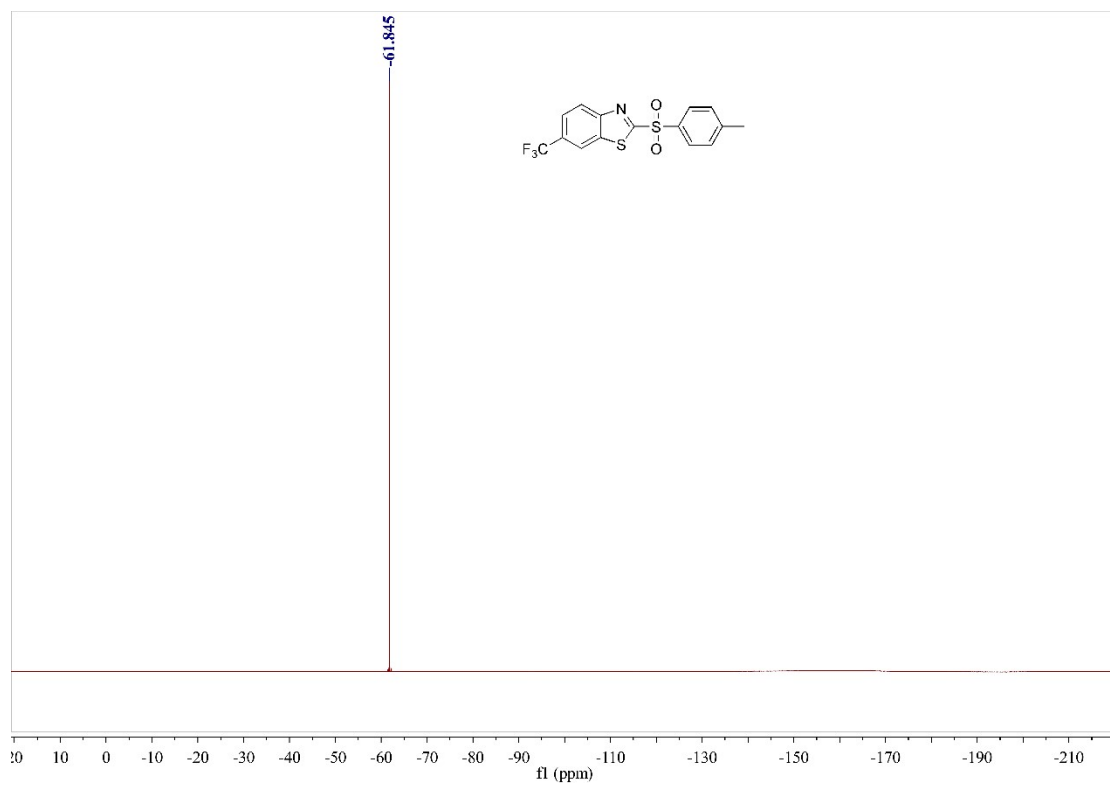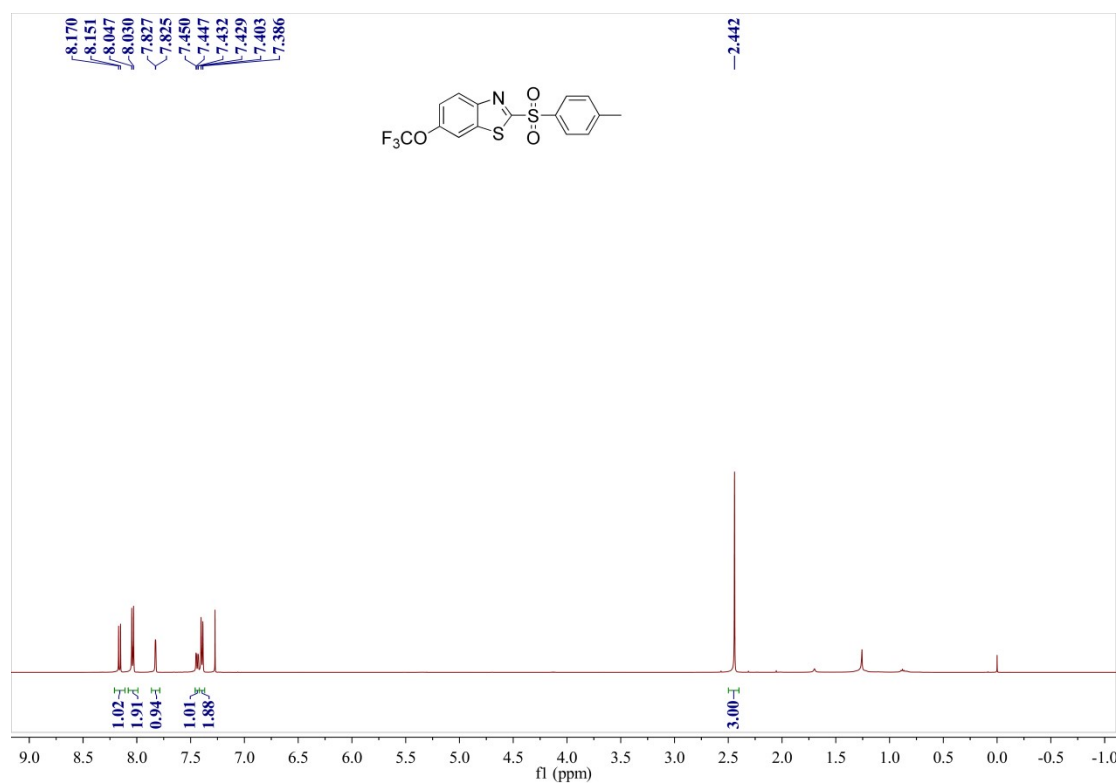



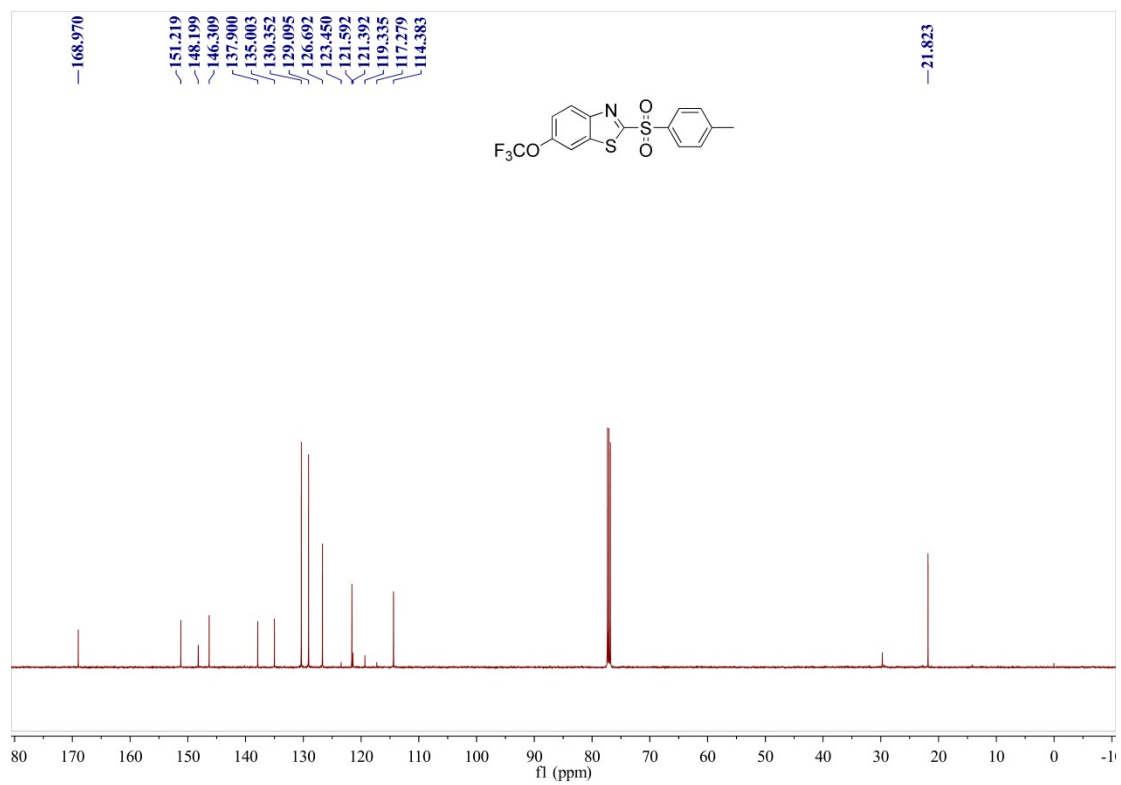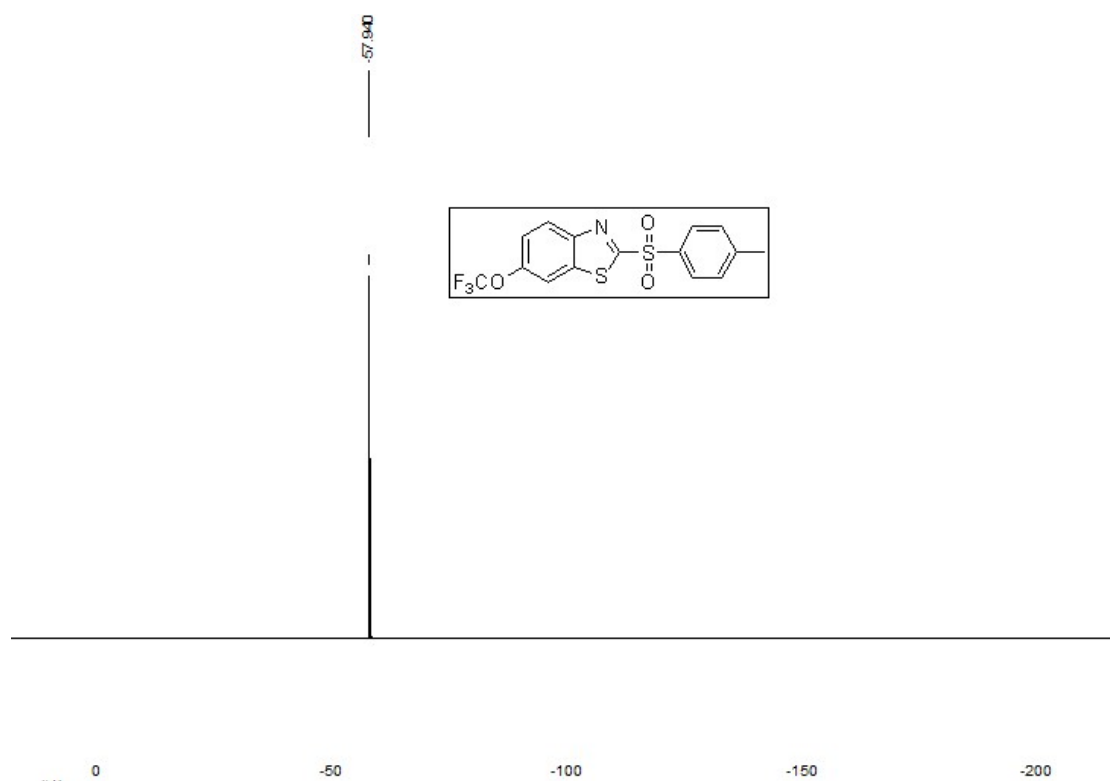

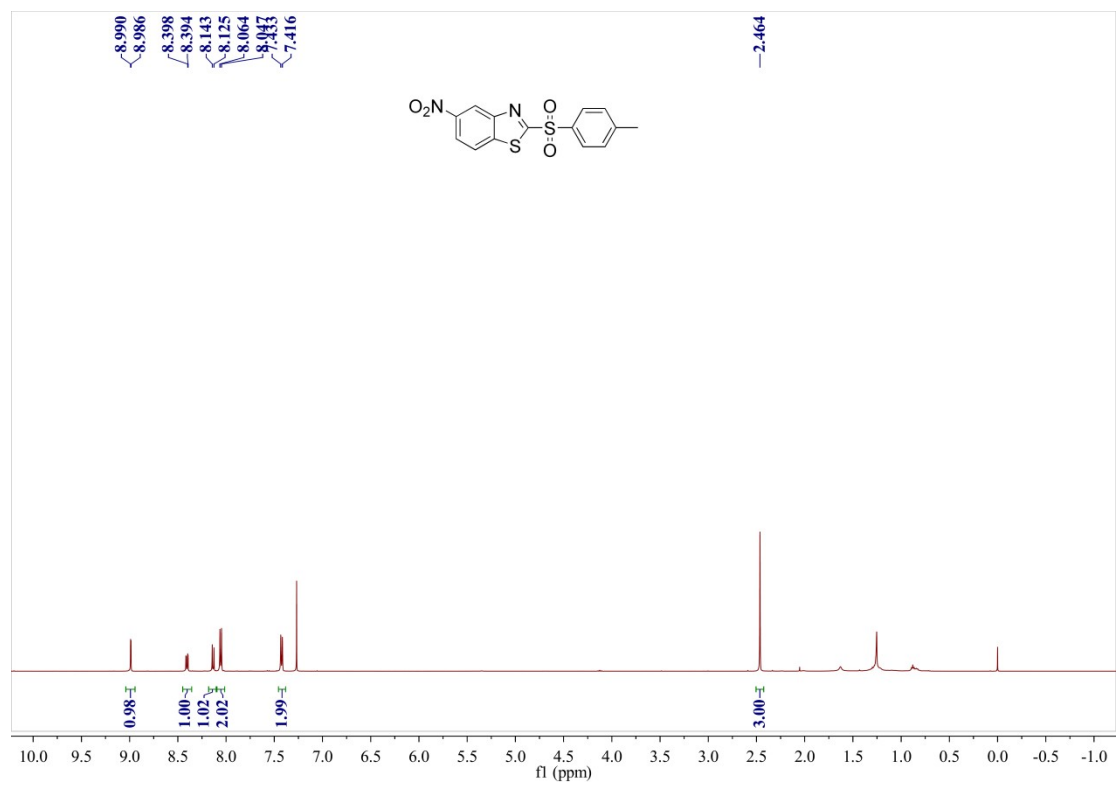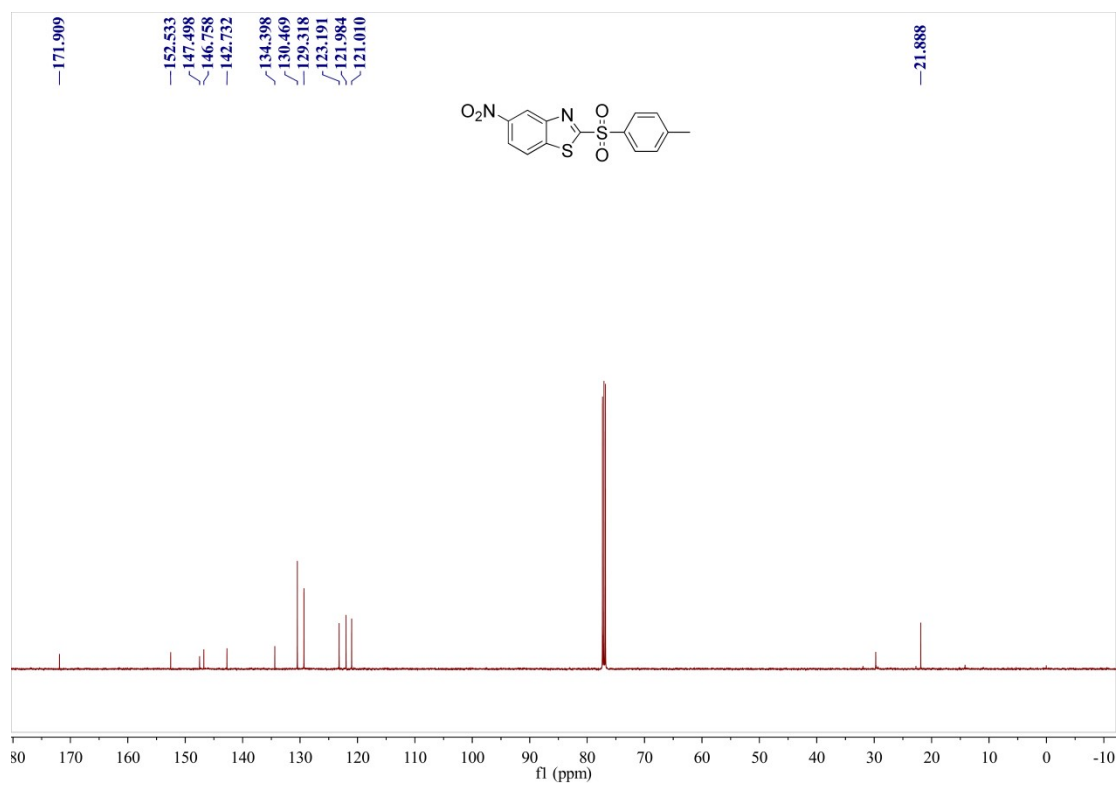

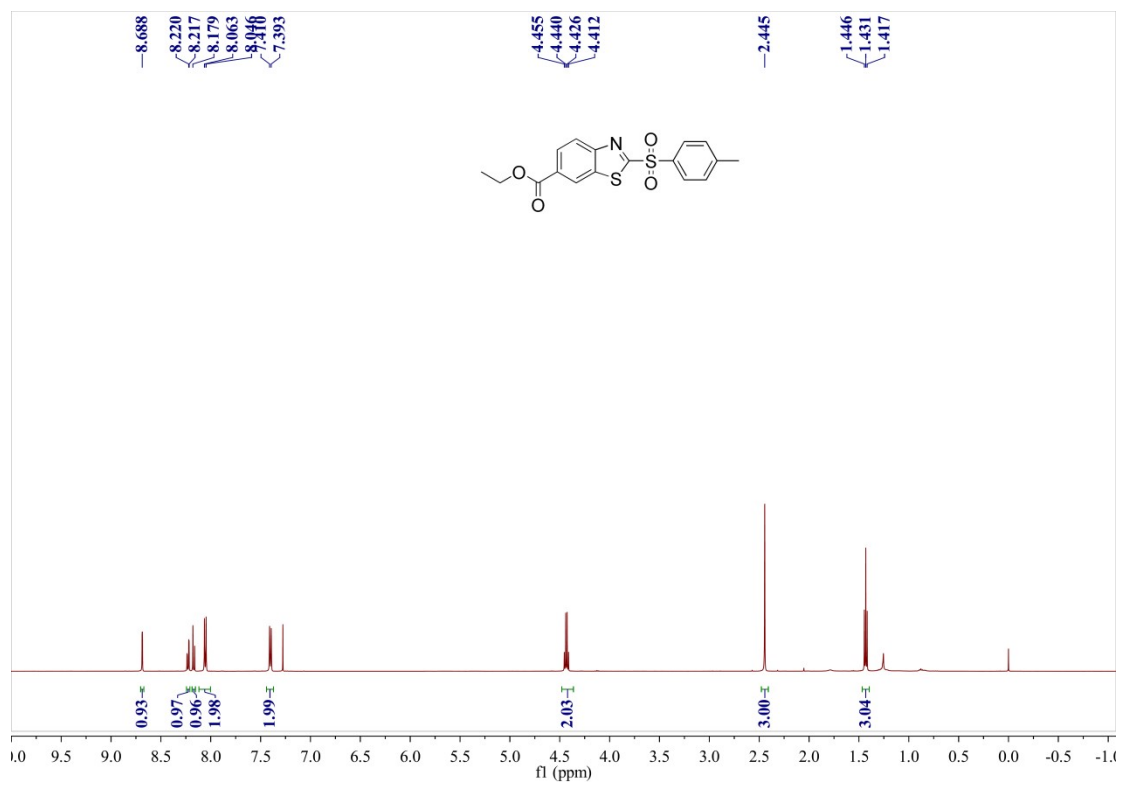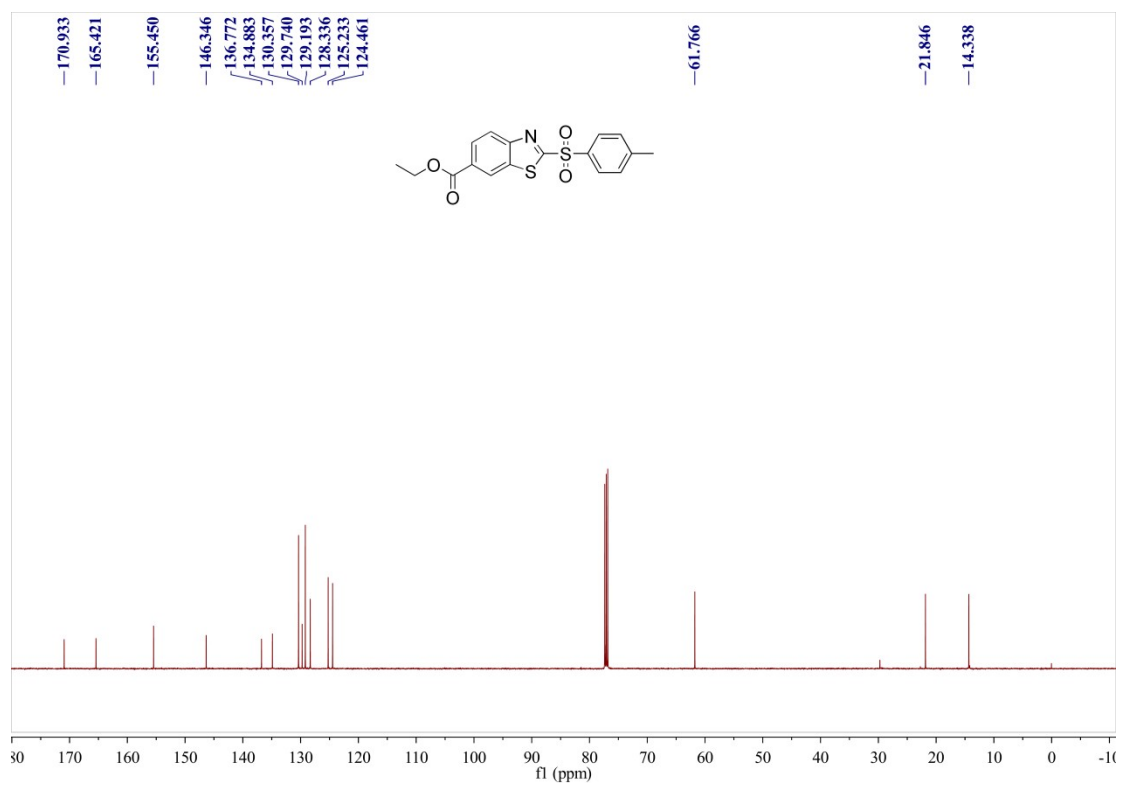

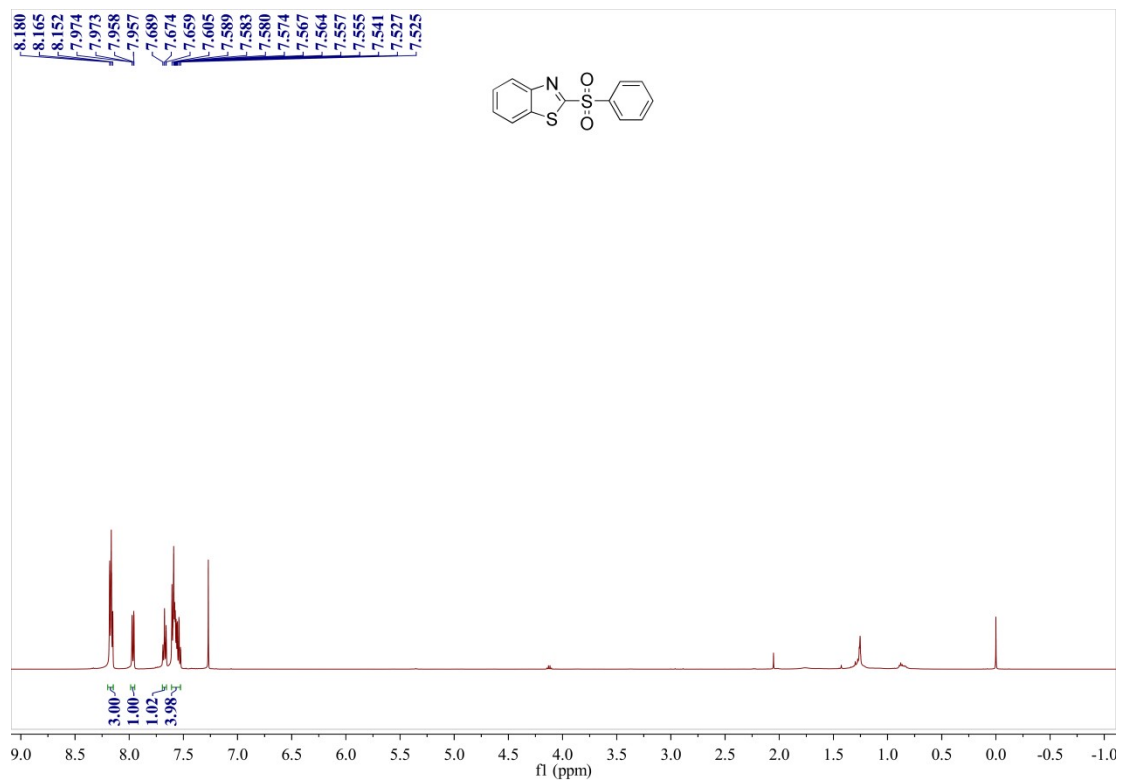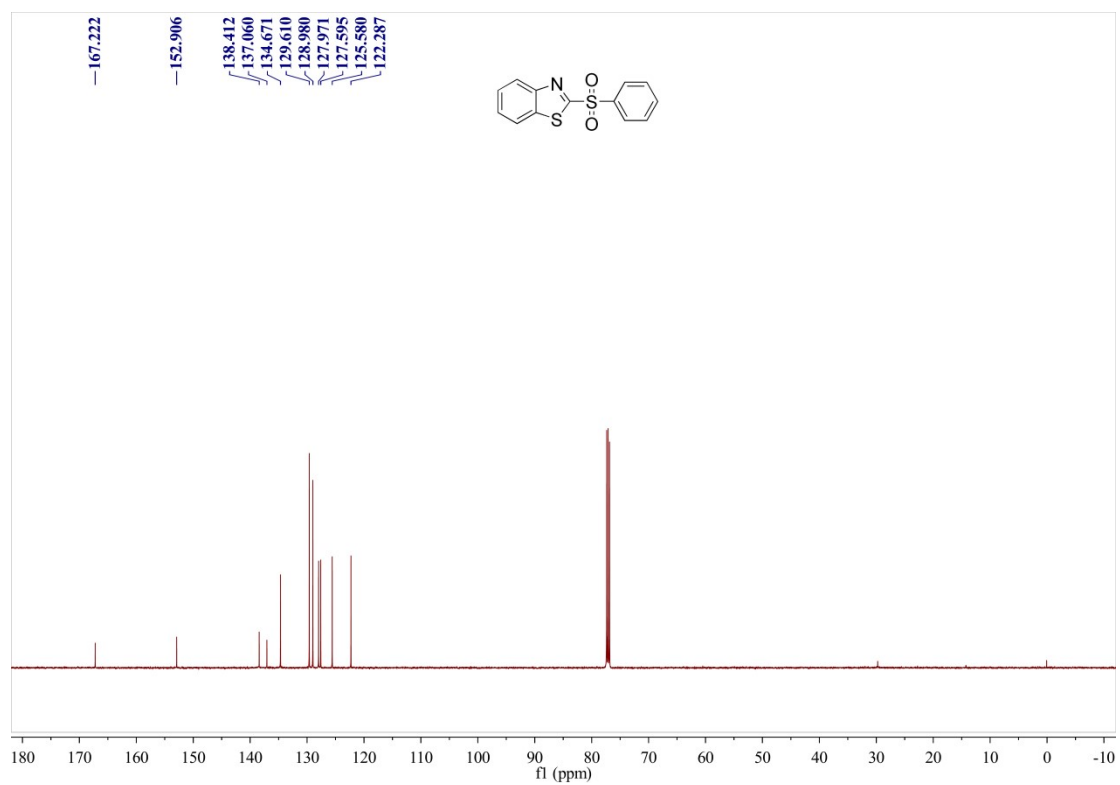

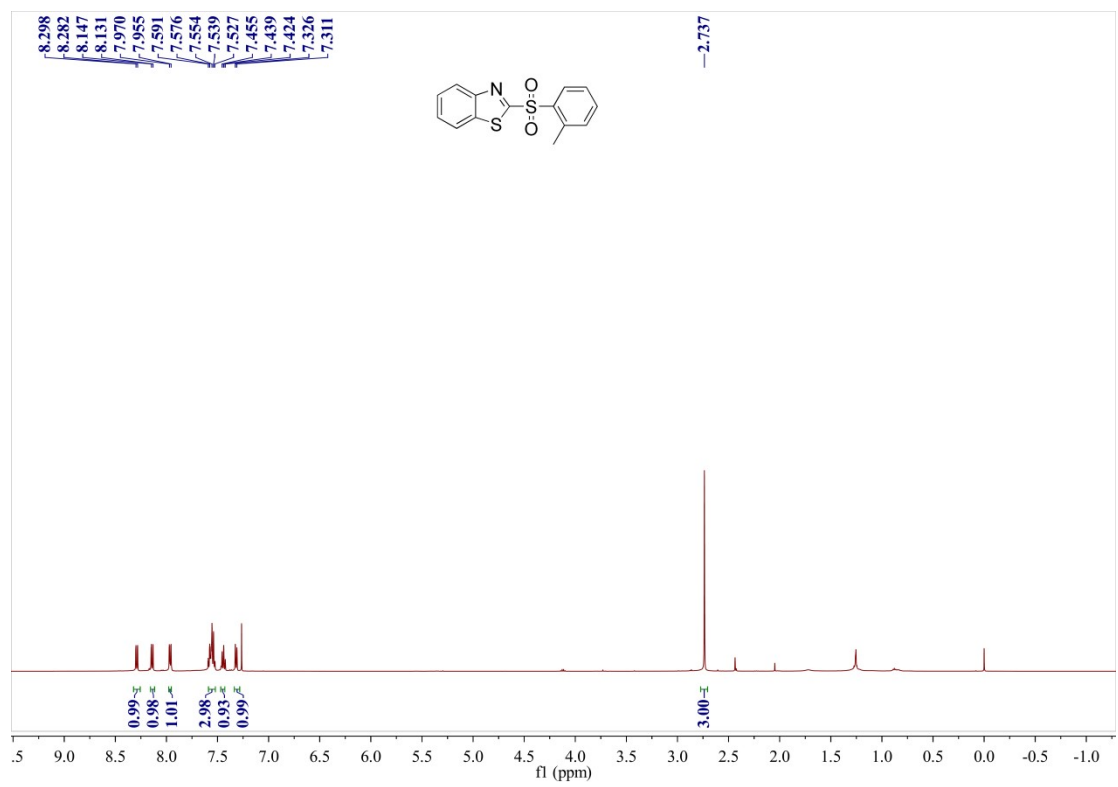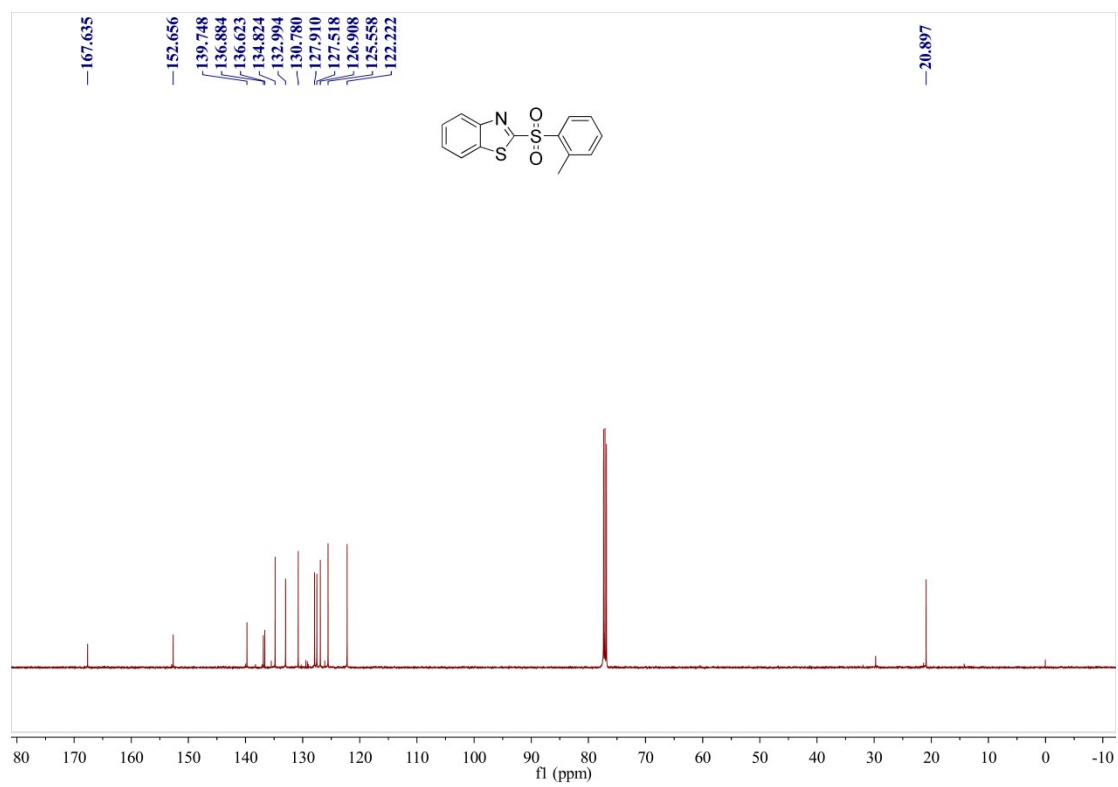

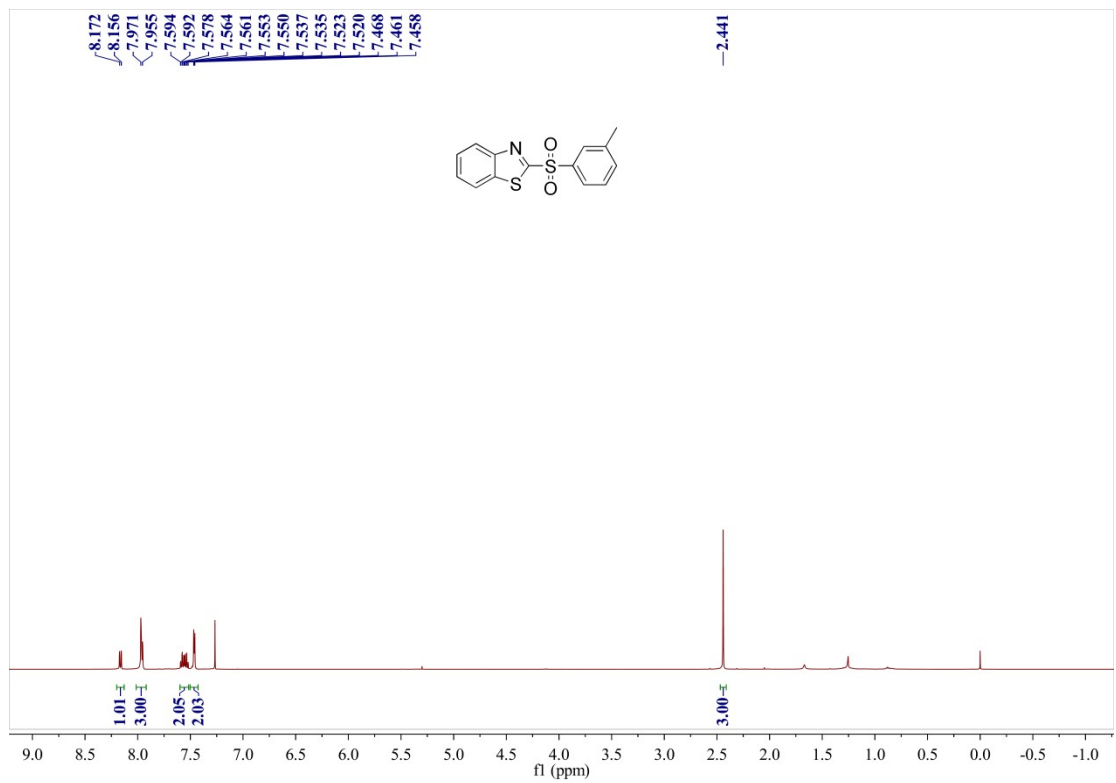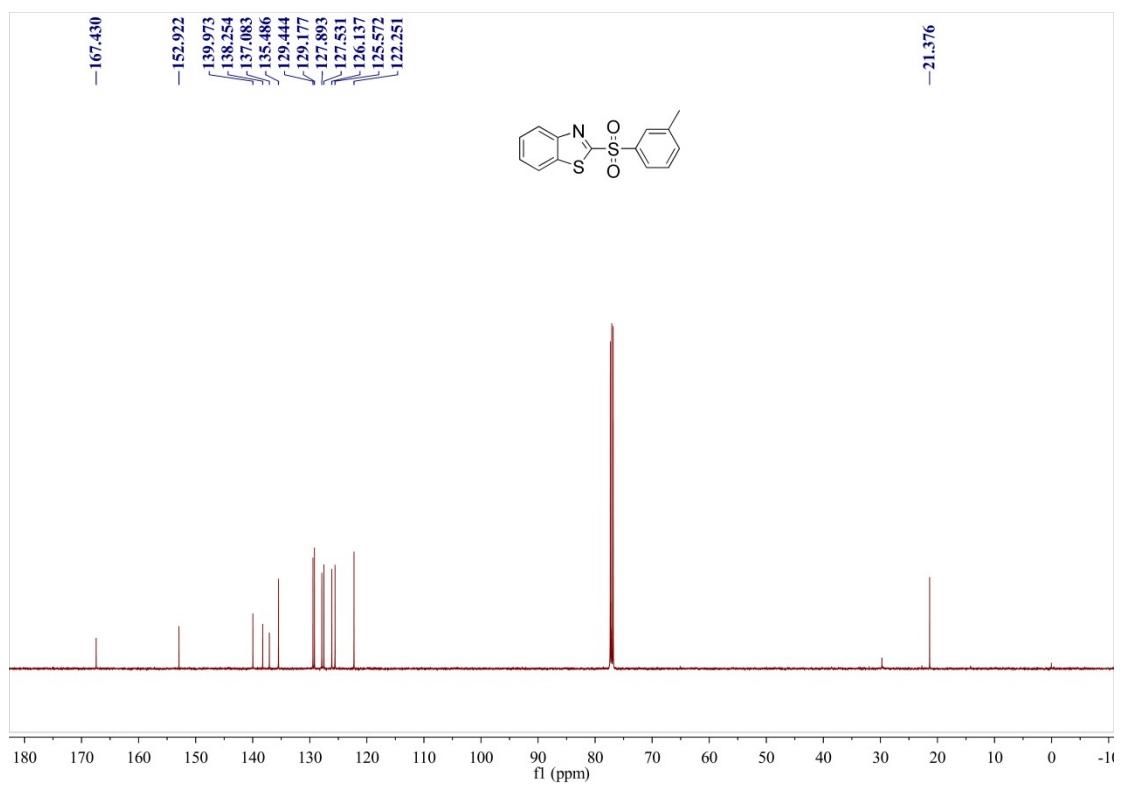

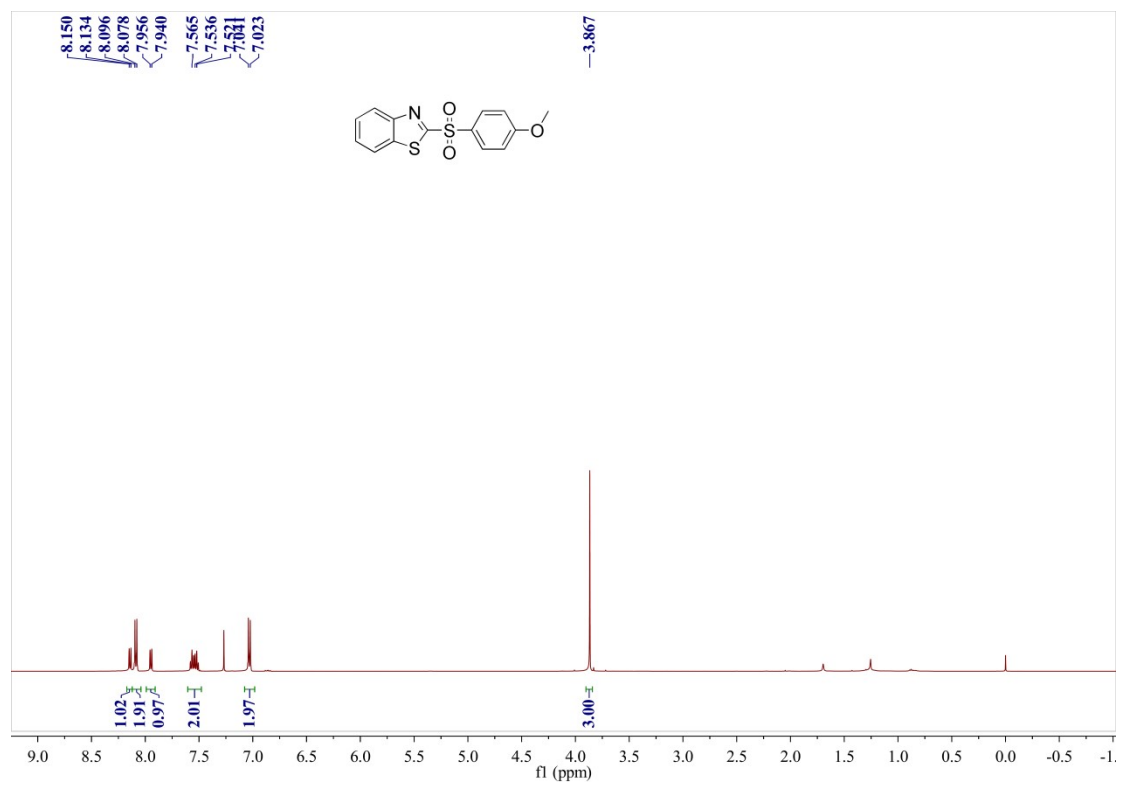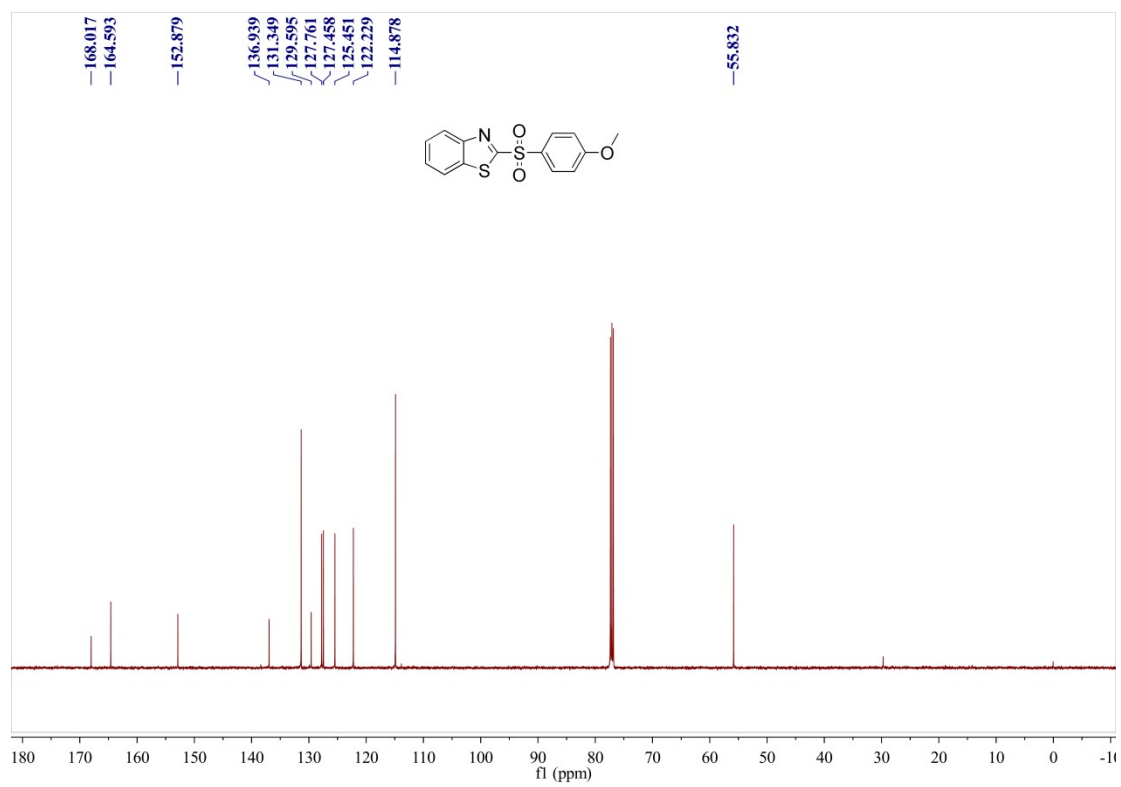

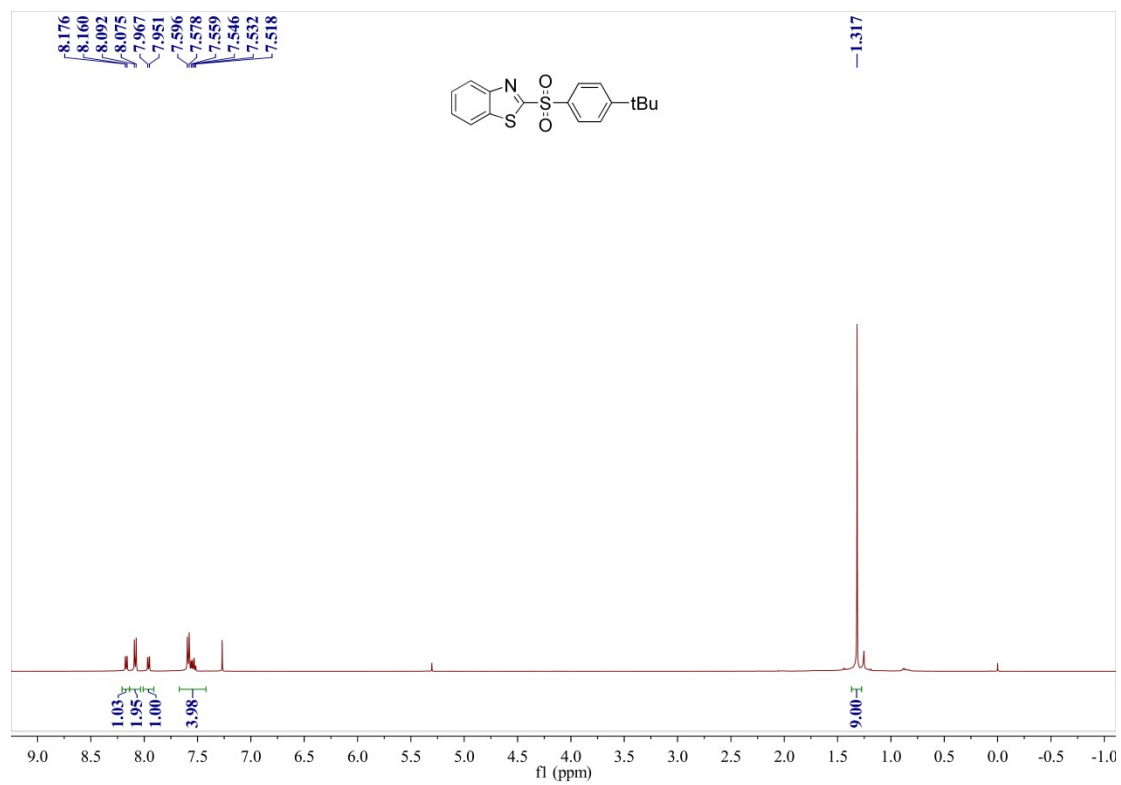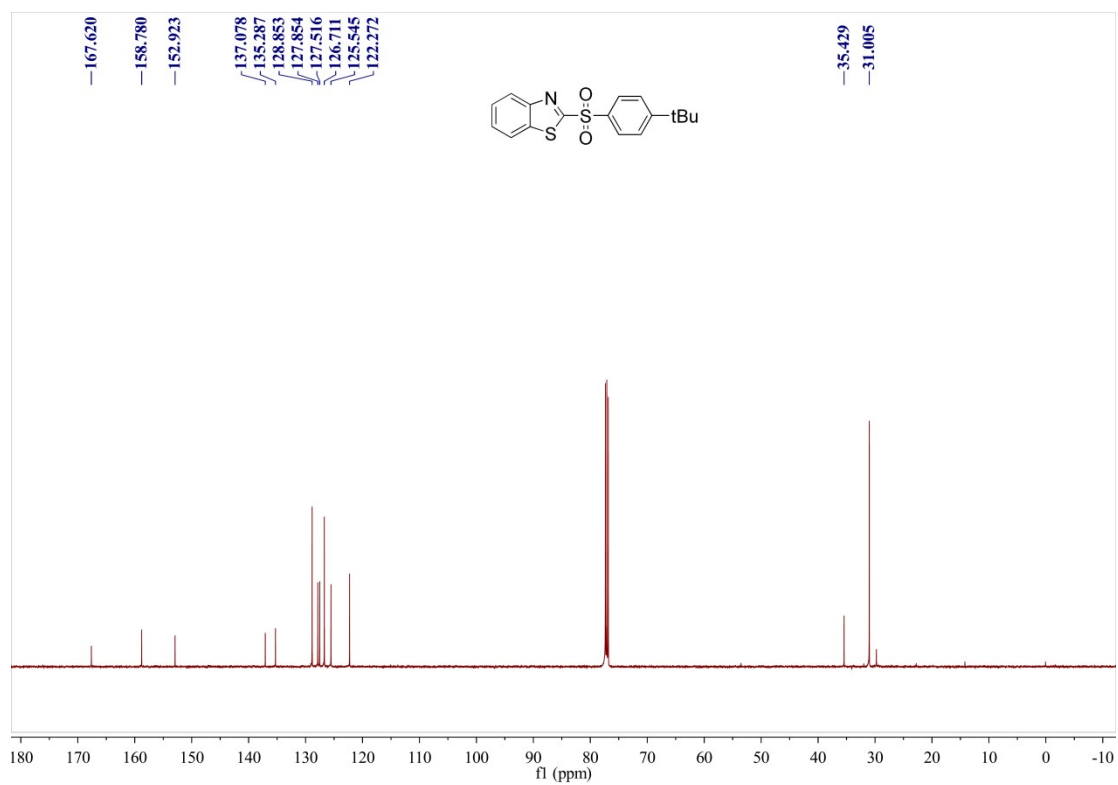



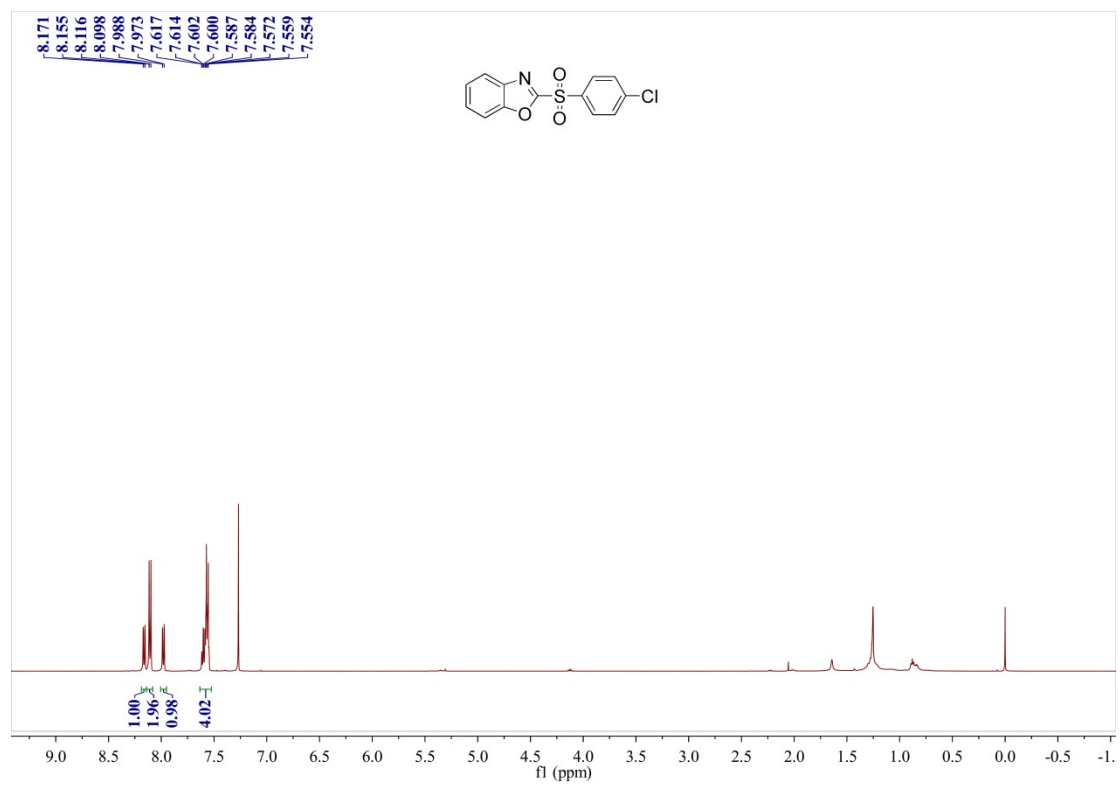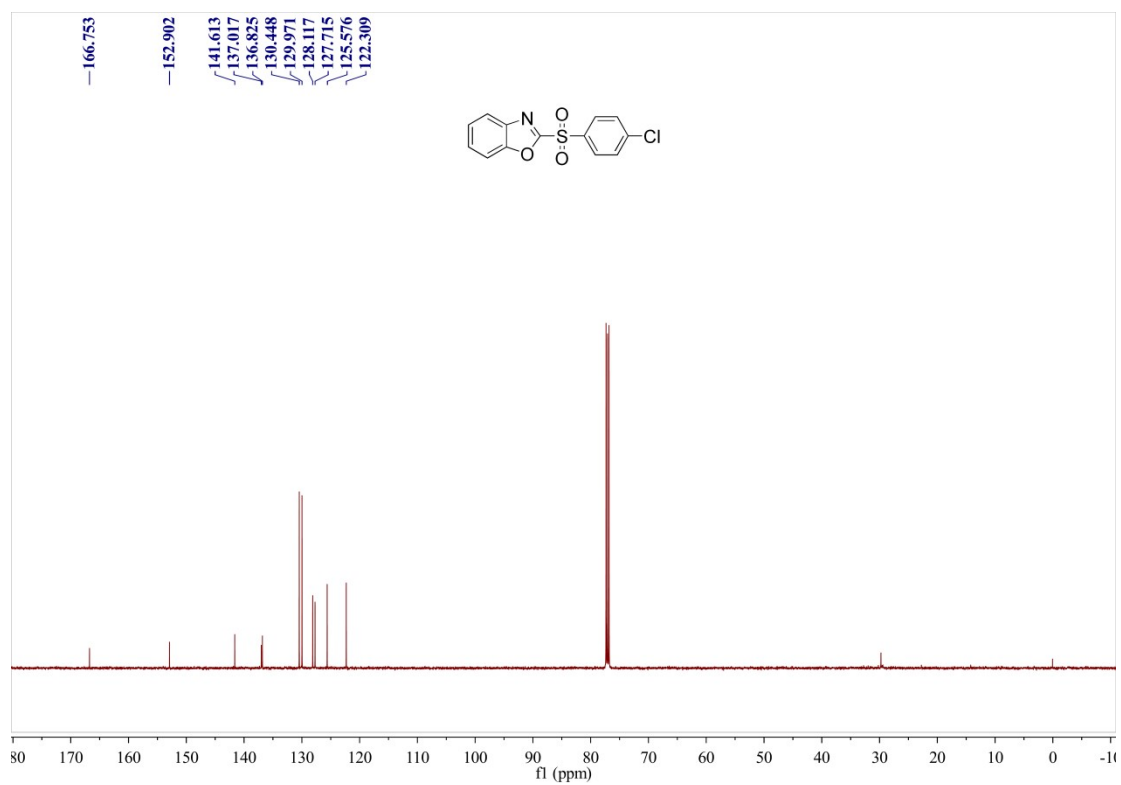

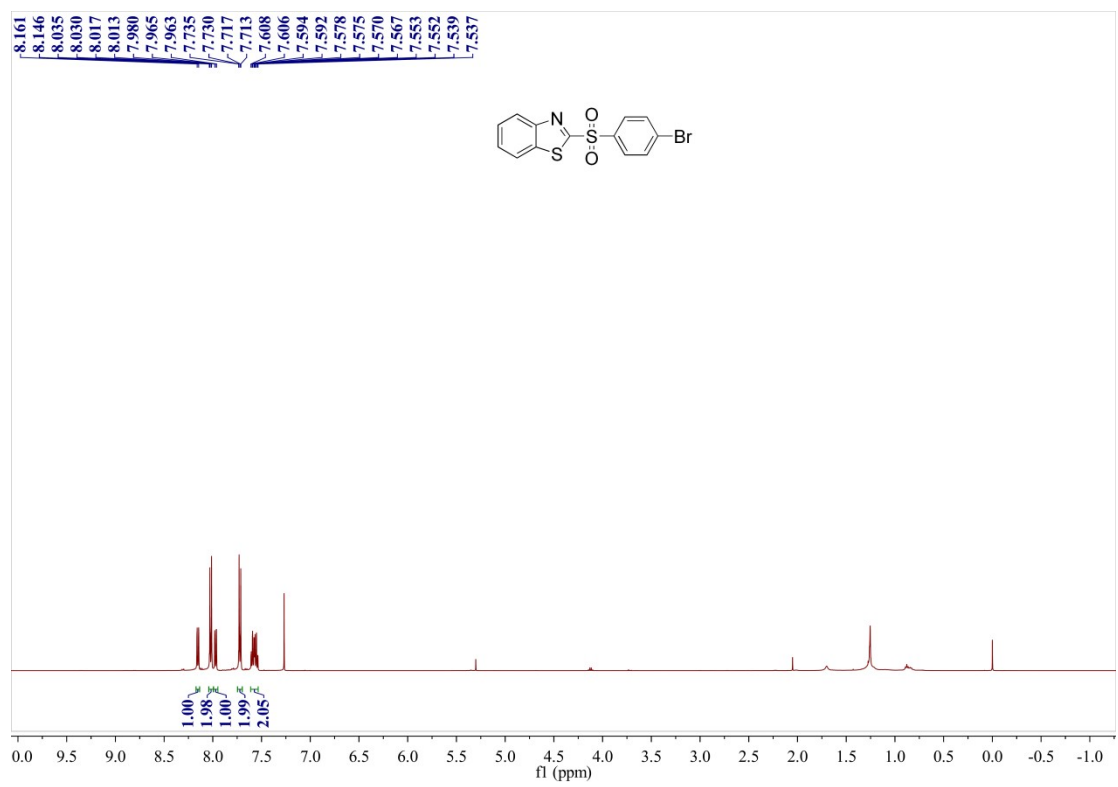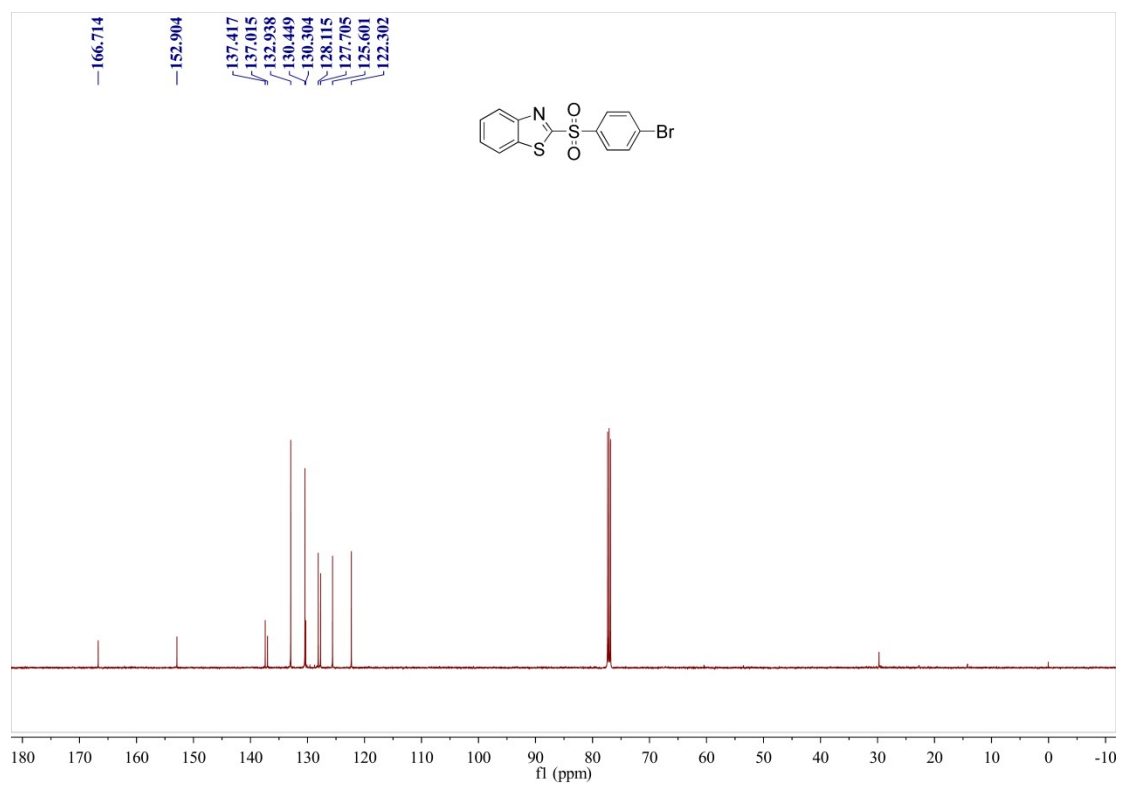

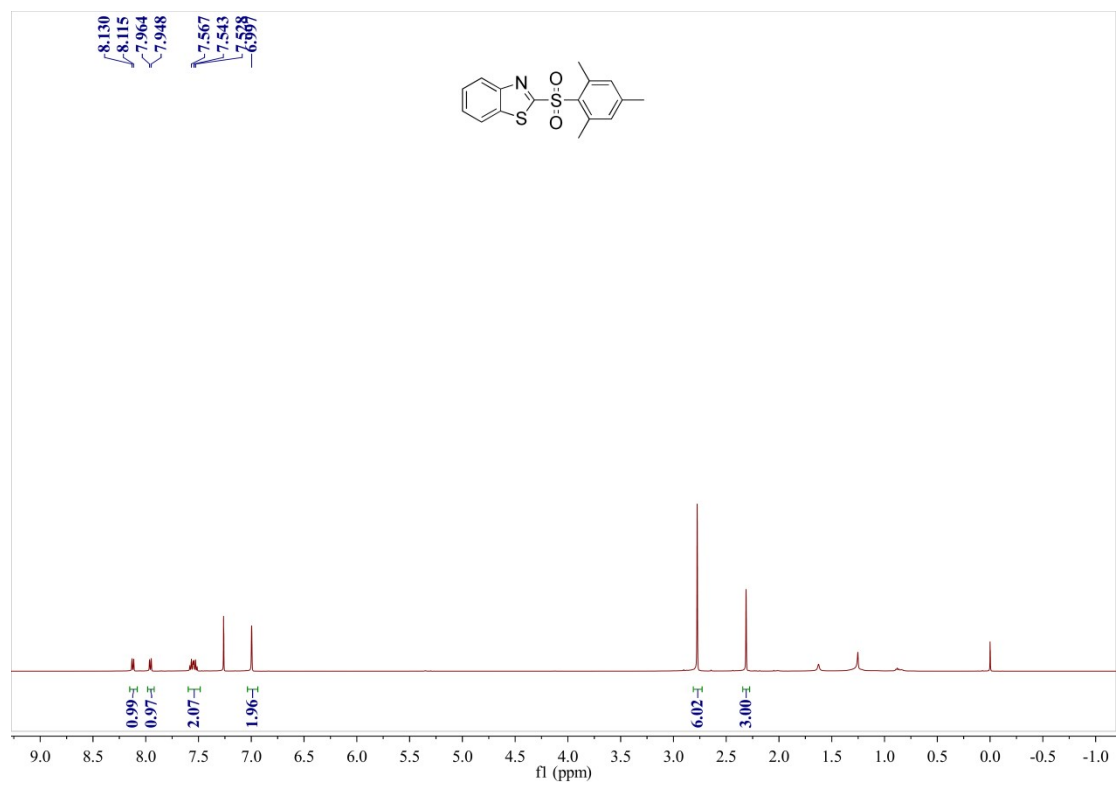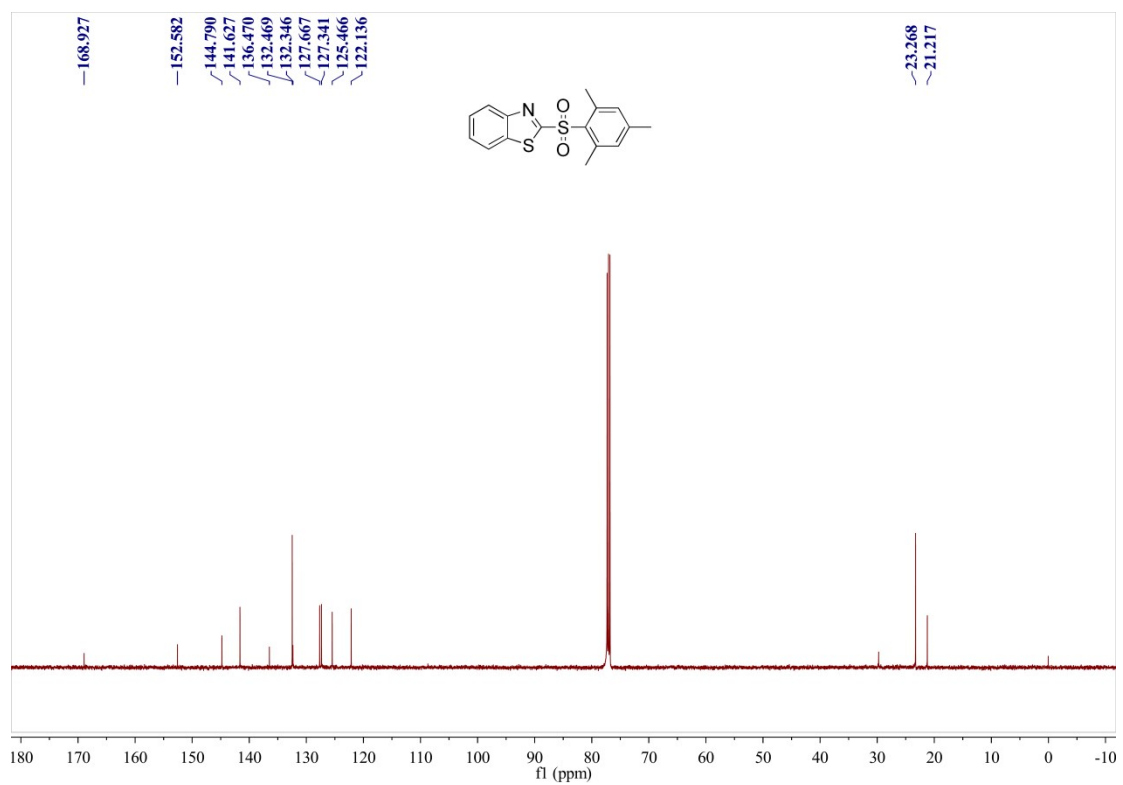

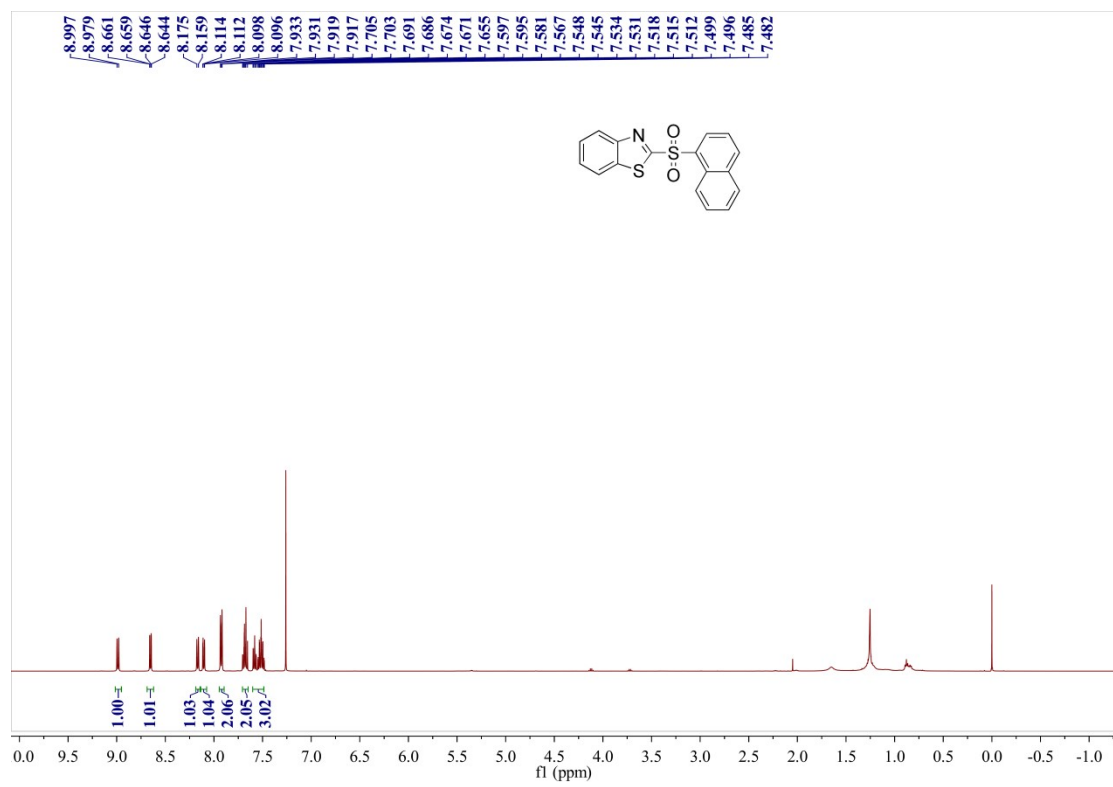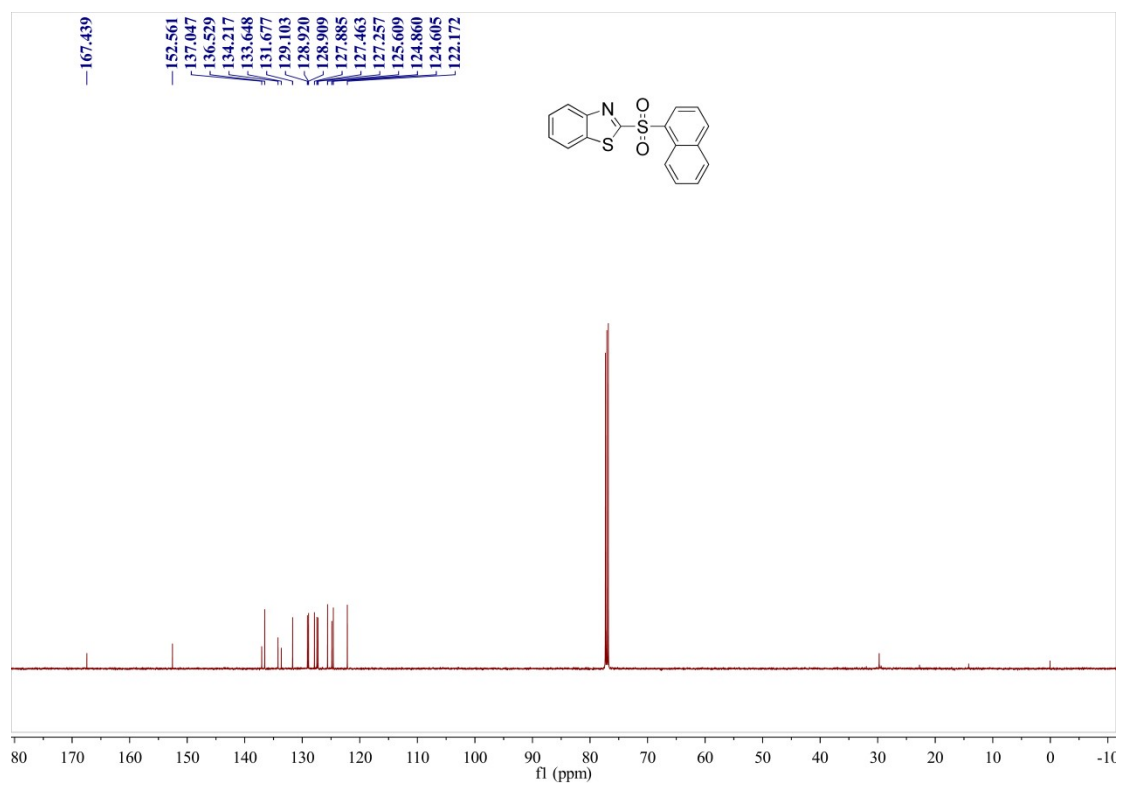

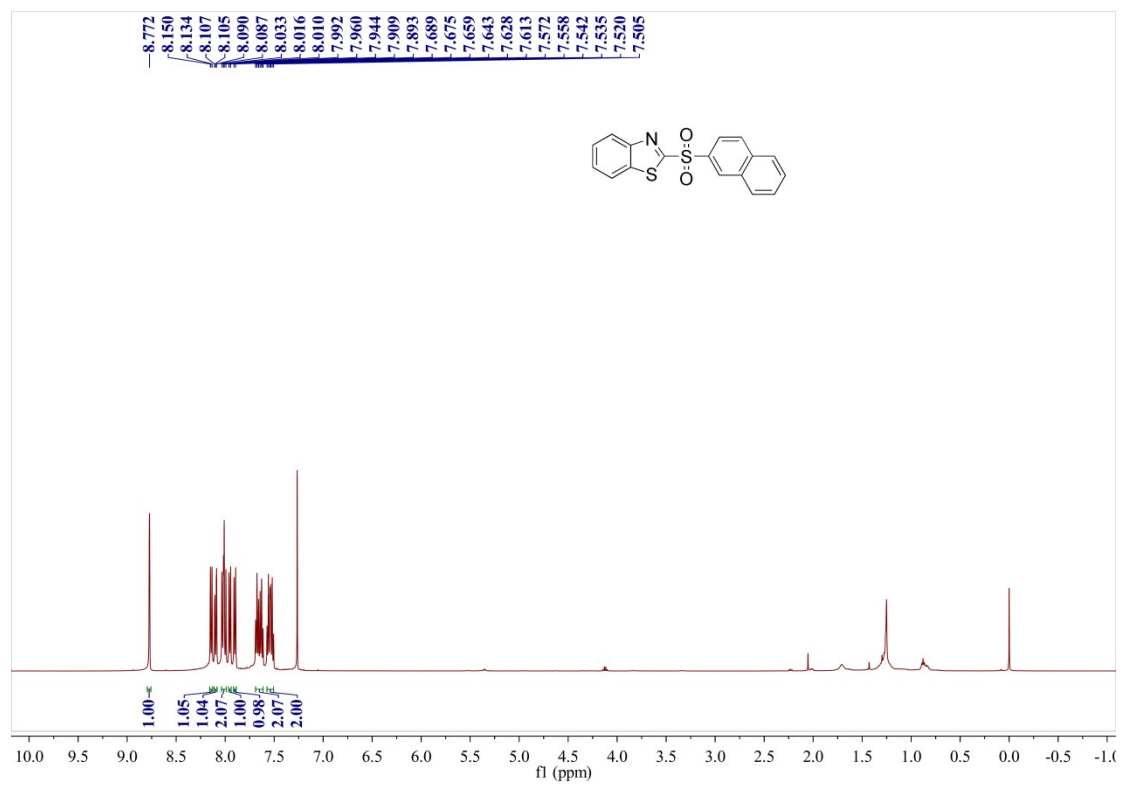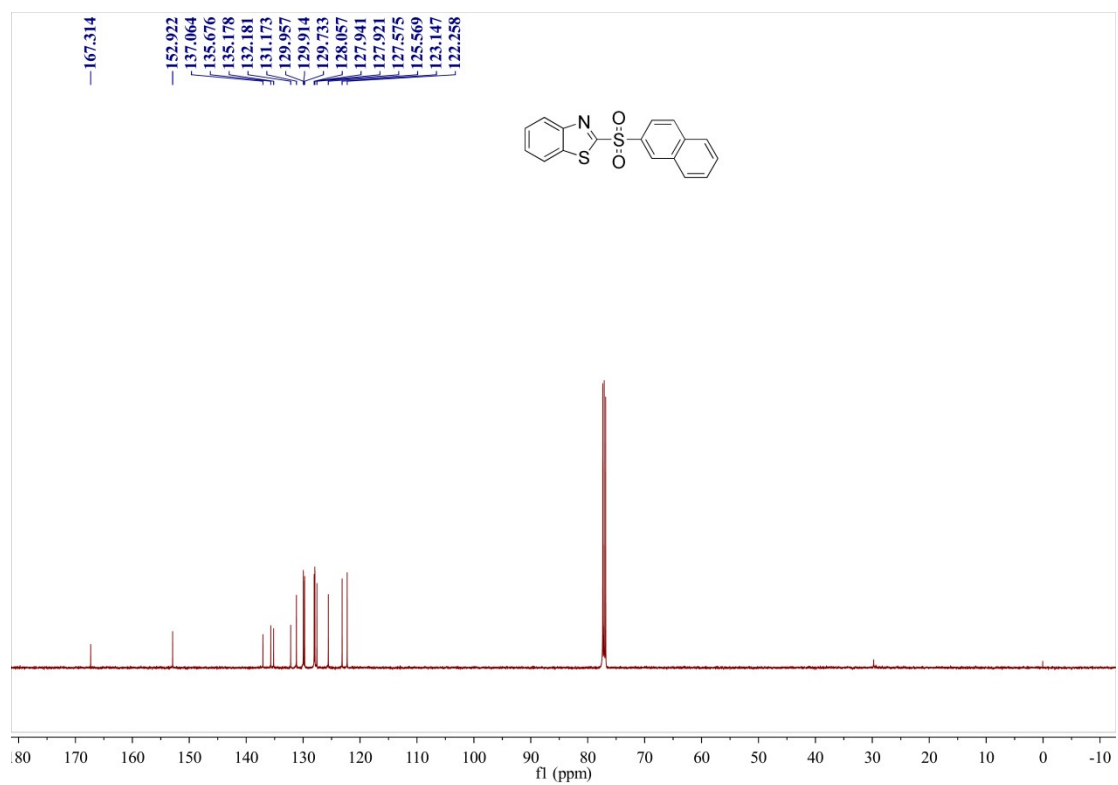

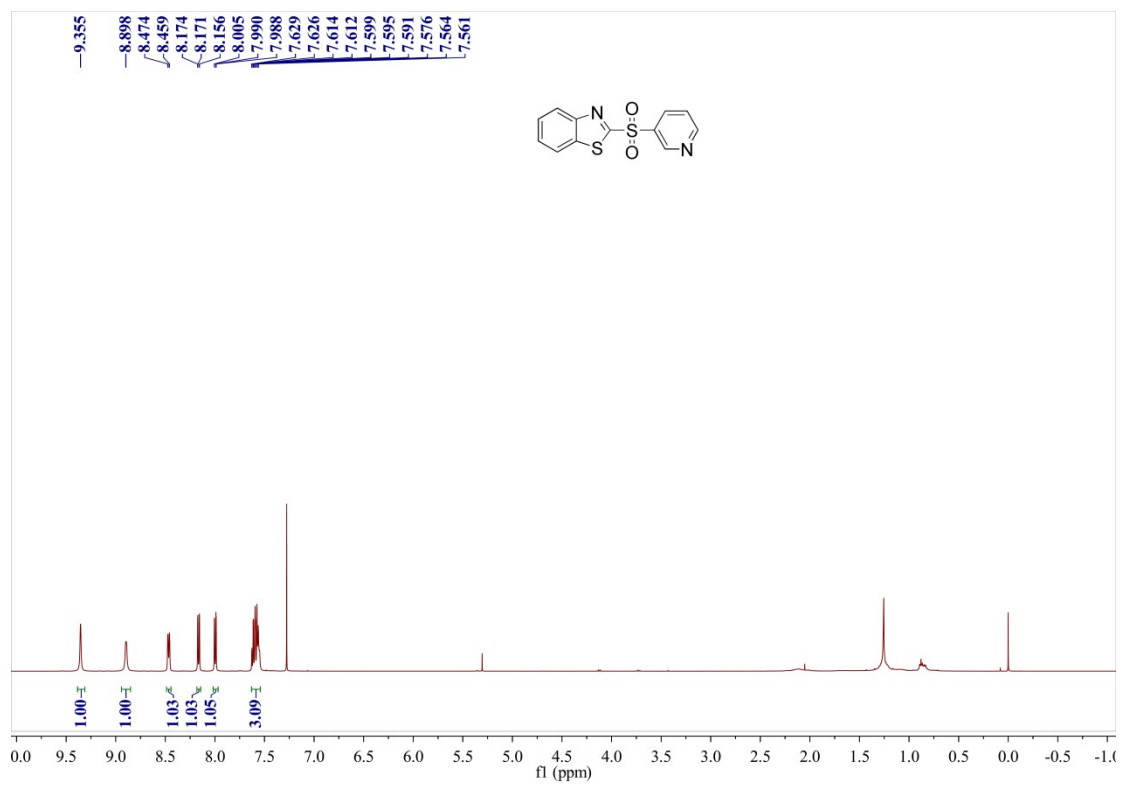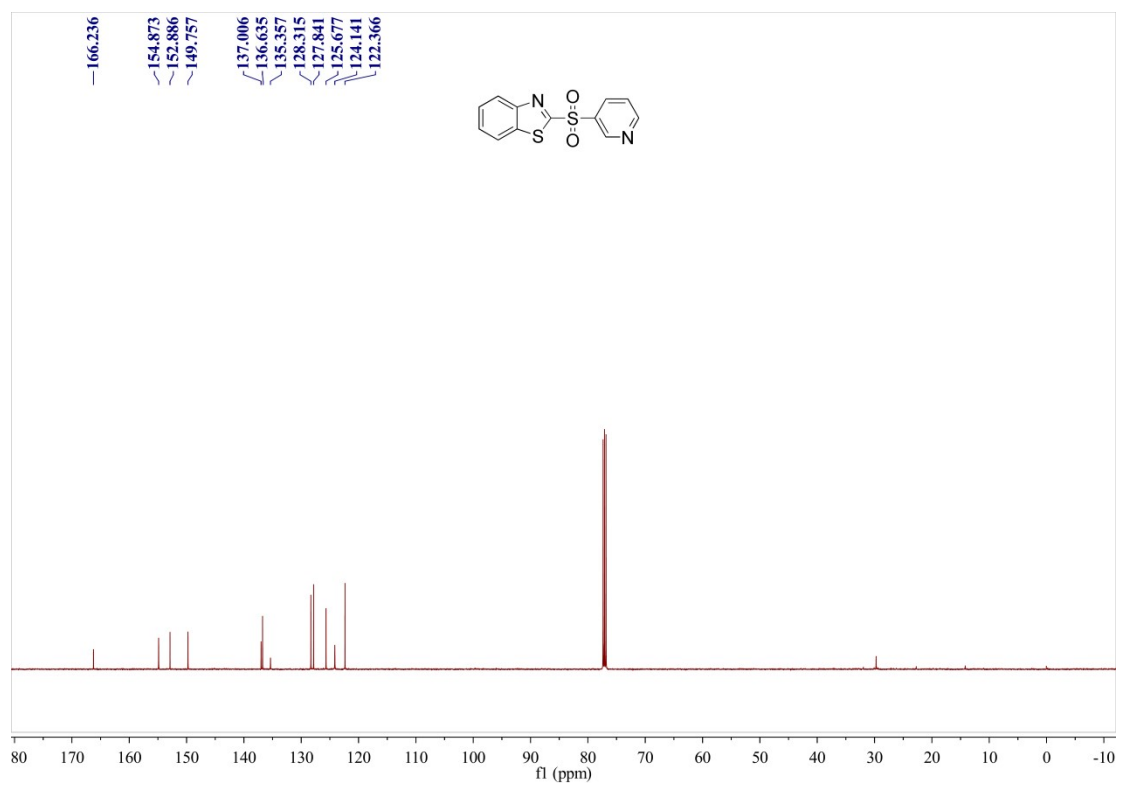

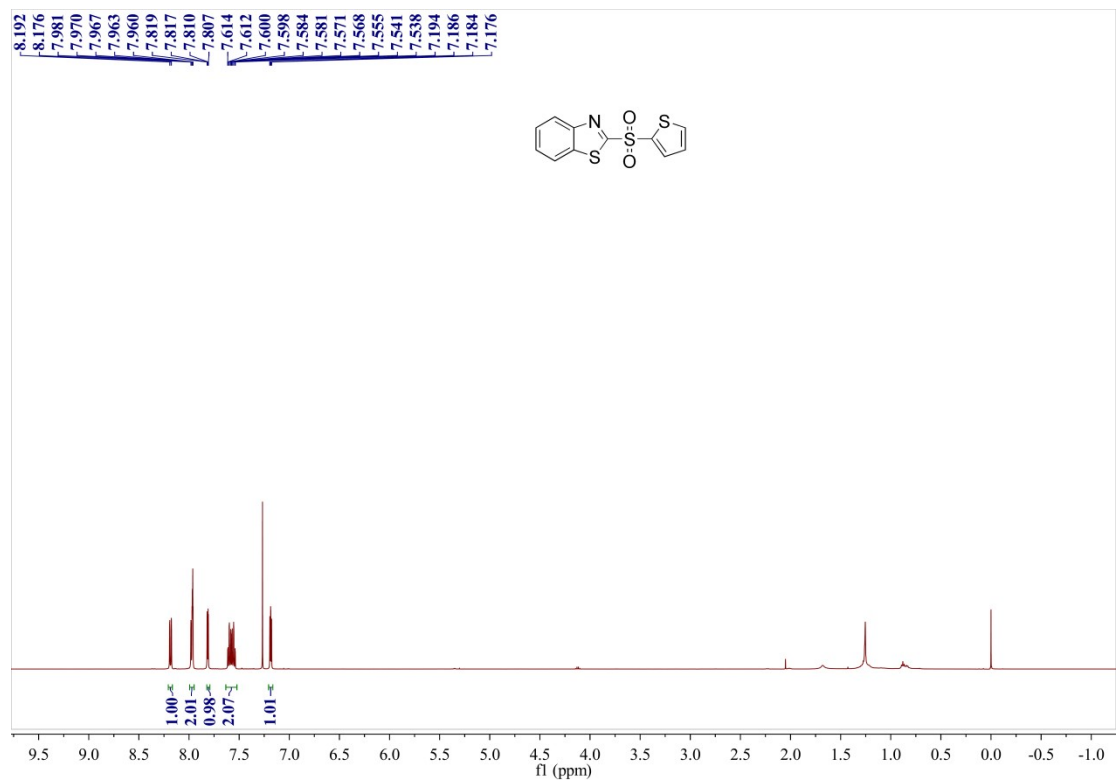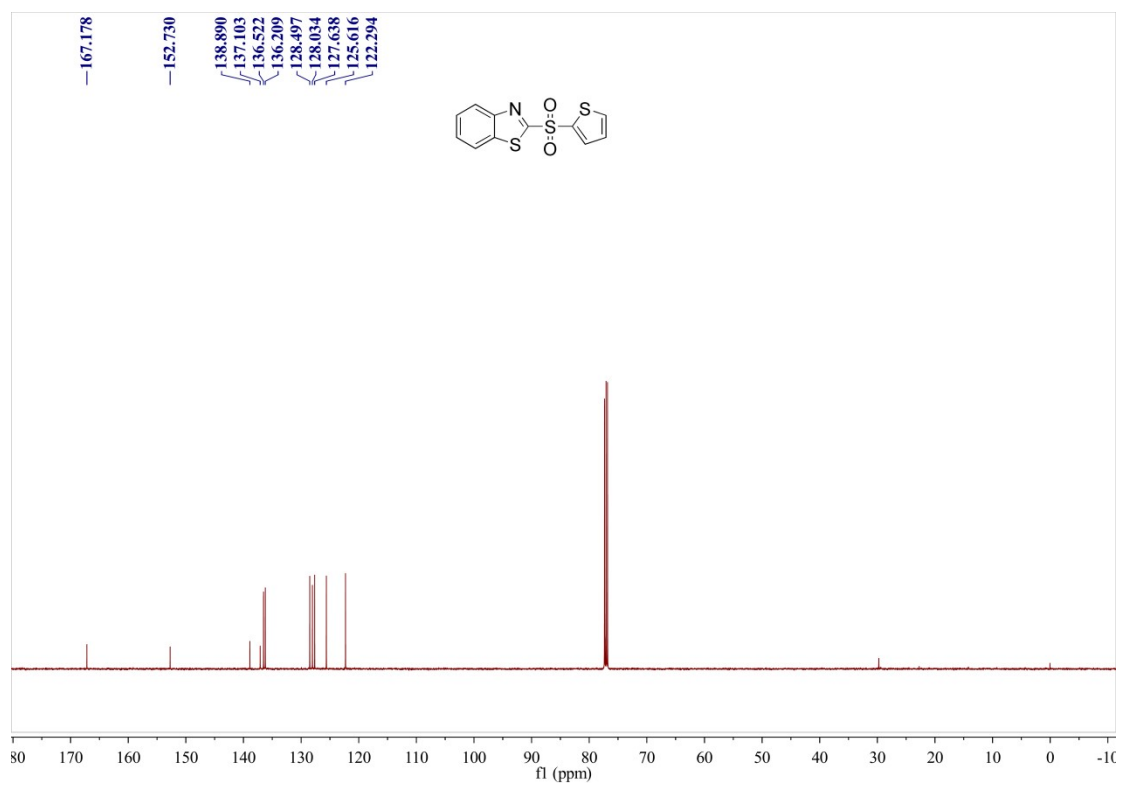

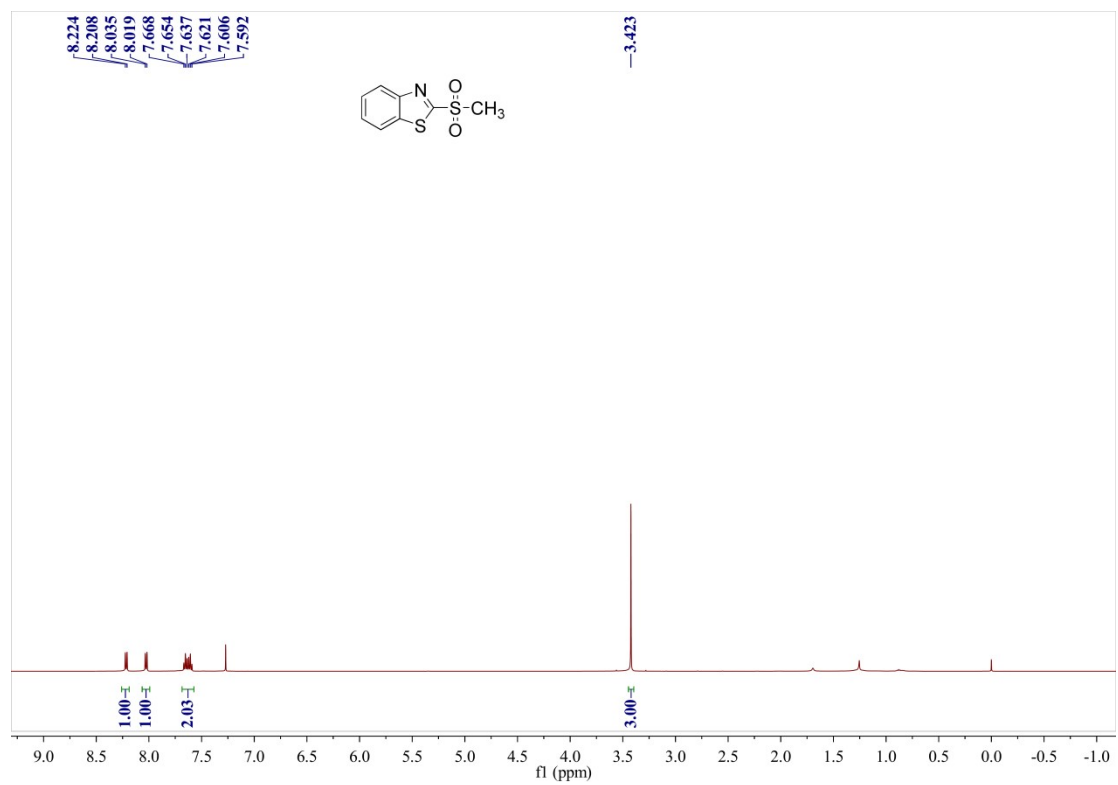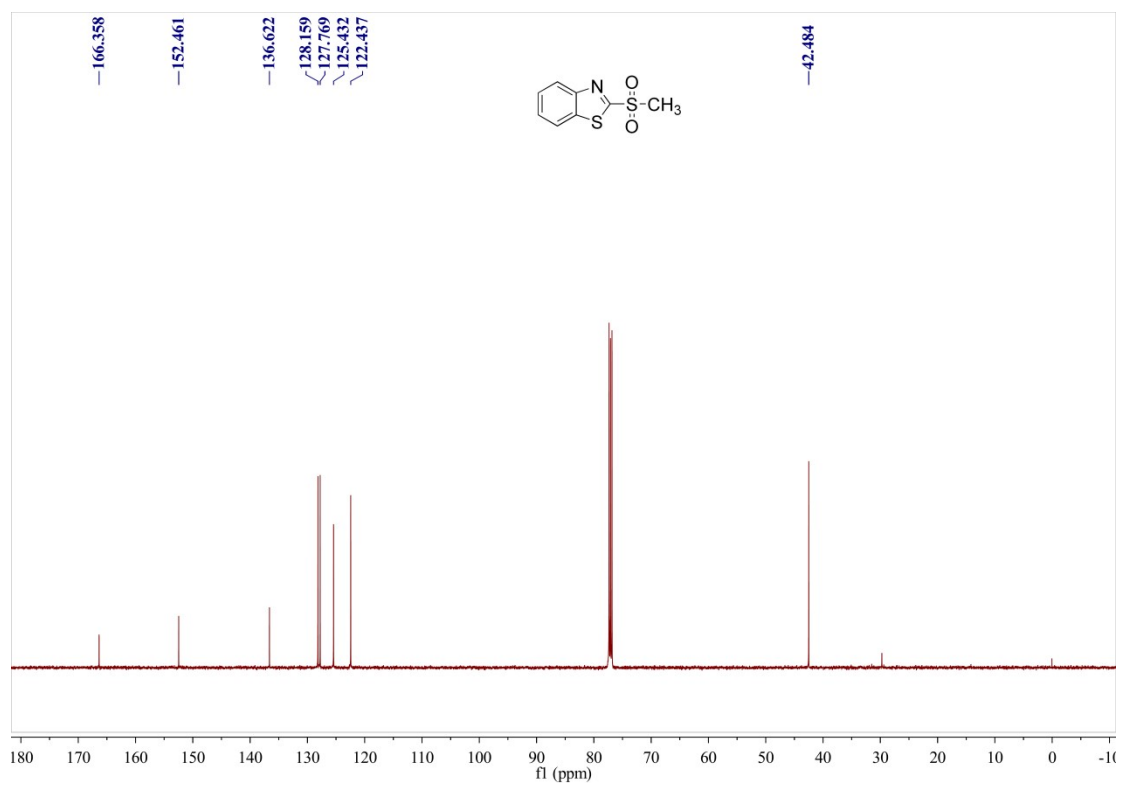



## 5. References.

- [S1] A. S. Deeming, C. J. Russell and M. C. Willis. *Angew. Chem. Int. Ed.*, 2016, **55**, 747 -750.
- [S2] N. Fukuda and T. Ikemoto, *J. Org. Chem.*, 2010, **75**, 4629–4631.
- [S3] P. K. T. Lo, Y.-D. Chen and M. C. Willis, *ACS Catal.*, 2019, **9**, 10668–10673.
- [S4] X. Maset, G. Guillena and D. J. Ramón, *Chem. Eur. J.*, 2017, **23**, 10522-10526.
- [S5] S. Liang, R.-Y. Zhang, L.-Y. Xi, S.-Y. Chen and X.-Q. Yu, *J. Org. Chem.*, 2013, **78**, 11874–11880.
